1 **EPSTEIN-BARR VIRUS LMP1 ENHANCES LEVELS OF MICROVESICLE-**  
2 **ASSOCIATED PD-L1**

3 Monica Abou Harb<sup>1</sup>, Li Sun<sup>1</sup>, David G. Meckes Jr.<sup>1\*</sup>

4 <sup>1</sup> Department of Biomedical Sciences, Florida State University College of Medicine,  
5 Tallahassee, FL, 32306

6

7 \* Corresponding author

8 David G. Meckes Jr.

9 1115 West Call Street

10 Tallahassee, FL 32306-4300

11 Phone: (850) 645-2330

12 Fax: (850) 644-5781

13 david.meckes@med.fsu.edu

14

15

16

17

18

19

20

21

22

23

24

25 **Abstract:**

26 Extracellular vesicles (EVs) circulate throughout the body and carry cargo that can be  
27 conferred to proximal or distant cells, making them major delivery vehicles for cellular  
28 communication. Epstein-Barr virus (EBV) infected cells release EVs that contain viral proteins  
29 such as the major viral oncogene, latent membrane protein 1 (LMP1). LMP1 has been shown  
30 to regulate the cellular gene expression of programmed cell death protein 1 ligand (PD-L1).  
31 PD-L1, a protein that suppresses the immune system by binding to PD-1, (a receptor found on  
32 cytotoxic T cells). PD-L1 has been recently found to be packaged into small EVs contributing  
33 to immune evasion of lung cancer cells. Recent studies establish that MVs are shed in very  
34 large amounts by tumor cells, and that elevated levels of MVs correlate to disease metastasis  
35 and cancers being more aggressive. Here, we demonstrate PD-L1 enrichment in MVs  
36 released from nasopharyngeal carcinoma cells and an important function of EBV LMP1 in  
37 regulating PD-L1 levels in MVs. These PD-L1+ MVs containing LMP1 likely contribute to the  
38 immunosuppressive microenvironment found in EBV-associated cancers.

39

40 **Importance:**

41 Accumulating evidence over the past decade supports that viruses utilize EVs and associated  
42 pathways to incorporate viral products to evade eliciting an immune response, while  
43 concurrently enabling viral spread or persistence within the host. Considering that viral proteins  
44 confer very strong antigenic peptides that will be recognized by T cells, the regulation of the  
45 PD-1 pathway by the overexpression of MV-associated PD-L1 may be a strong immune  
46 evasion tactic utilized by viruses. The discovery that EBV LMP1 increases PD-L1 microvesicle  
47 secretion, identifies a new therapeutic target in immune blockade therapy. We expect that our

48 findings will begin to clarify the mechanism of LMP1-mediated enhanced packaging of PD-L1  
49 into MVs and may produce more specific targets to treat EBV-associated cancers.  
50 Consequently, identifying whether a disease is of viral origin through predictive MV biomarkers  
51 could further allow for more targeted therapies.

52

53 **KEYWORDS:** Epstein-Barr virus, microvesicles, extracellular vesicles, human herpesviruses,  
54 PD-L1, LMP1, oncosome, exosomes

55

## 56 **Introduction**

57 Epstein-Barr virus (EBV) is a human herpesvirus that persistently infects over 90% of the  
58 world's population (1). Most individuals are asymptomatic; however, in immunocompromised  
59 or genetically susceptible individuals, EBV infection can cause various lymphomas and  
60 carcinomas (1). PD-L1 normally functions by suppressing an individual's immune system from  
61 attacking their own cells within the body. Any pathogenic, viral, or foreign substance trying to  
62 invade the body is combated by the immune system; however, certain cancer cells take  
63 advantage of the functions of PD-L1 and overexpress this gene in order to escape immune  
64 detection and maintain proliferation and survival. PD-L1 exists in the blood in two different  
65 forms: extracellular vesicle-associated or a soluble protein. One of the first observations of PD-  
66 L1 being expressed on small extracellular vesicles (EVs) was in 2011 where investigators  
67 detected exosomal PD-L1 extracted from human samples of plasma and urine (2).  
68 Additionally, PD-L1 has been found on the surface of antigen presenting cells such as B cells,  
69 mast cells, and certain epithelial and endothelial cells (3, 4). It is highly expressed on the

70 surface of tumor cells, T lymphocytes and tumor associated macrophages (5). Additionally, it  
71 can be found in many tissues such as muscles and nerves (6). PD-L1 suppresses the immune  
72 system by binding to PD-1, a receptor found on cytotoxic T cells. The PD-1 pathway involves  
73 several interactions leading to the inhibition of T-regulatory functions and the production of  
74 interleukins which results in a reduced immune response, T cell apoptosis and exhaustion, and  
75 the suppression of dendritic cells (7). These cumulative immunosuppressive effects create a  
76 very strong protective barrier for cancerous cells to grow uncontrollably and eventually  
77 metastasize throughout the body. PD-L1 may also play an important role in immune evasion  
78 strategies adopted by viruses and other human pathogens.

79 Some of the more recent data has suggested an important role for the PD-L1 ligand as a  
80 mechanism of achieving an immune resistant tumor microenvironment and establishing  
81 latency within the host in EBV infection. Expression of PD-L1 is significantly higher in EBV  
82 positive cells compared to EBV negative cells (8). It has been shown that high EBV copy  
83 number per infected cell is correlated with PD-L1 expression such as in EBV associated  
84 gastric carcinoma (9). The presence of high levels of PD-1 and PD-L1 in EBV+ patients is  
85 directly linked to the development of high-risk Hodgkin lymphoma (10). Considering that LMP1,  
86 (major viral oncogene expressed in EBV associated cancers), has been established in  
87 regulating PD-L1 levels within the cell and manipulates EV cargo and functions, we  
88 hypothesized that LMP1 may influence PD-L1 EV levels as an immune evasion mechanism.  
89 Ultimately, this would result in an immunosuppressive tumor microenvironment favoring viral  
90 sustainability and propagating infection, not only to neighboring cells, but cells throughout the  
91 body as well.

92 Viruses share many similarities with EVs, such as the transfer of functional cellular proteins,  
93 RNAs, and miRNAs into neighboring cells (11). The formation of large EVs or microvesicles  
94 (MVs) involves transport of cargo to the plasma membrane, lipid membrane redistribution,  
95 budding, and finally a form of vesicle pinching upon reaching the membrane which leads to the  
96 release of the vesicle (12). Shed MVs are distinct in size, cargo, and mechanism of formation  
97 from the other subpopulation of EVs known as small EVs. Both small EVs and MVs  
98 encapsulate and transfer cargo including proteins, miRNAs, and RNA transcripts to other cells.  
99 Caveolin-1 is essential for sorting of selected miRNAs into MVs (13). Both viruses and MVs  
100 emerge from the plasma membrane at lipid raft organizing centers indicating a similar form of  
101 biogenesis (14). Elevated levels of EVs in tumor microenvironments and within the circulation  
102 correlate to a more advanced disease stage in cancers. MVs play a role in acting as a bridge  
103 of cellular communication between cancer and the surrounding stroma to alter the surrounding  
104 tumor environment in a way that enhances their growth and survival. MVs shed from a highly  
105 metastatic melanoma cell line, were able to confer metastatic characteristics to poorly  
106 metastatic cells (15). Recent data has indicated a role for PD-L1 expression in small EVs;  
107 however, little is known about PD-L1 expression in MVs, the mechanism that leads to its  
108 upregulation, and the localization of PD-L1 in these different EV subpopulations.

109 Previous studies have already implicated a role for MVs in immune suppression. For example,  
110 MVs derived from colorectal carcinoma or human melanoma, suppressed monocyte  
111 differentiation into antigen presenting cells and suppressed T lymphocytes through TGF- $\beta$ ,  
112 both *in vivo* and *in vitro* (16). LMP1, (a major viral oncoprotein present in EVs), has been  
113 shown to be involved in indirectly inhibiting humoral immune response(17, 18). LMP1 has a  
114 major role in the lifecycle of EBV, is an important contributor to many EBV-associated cancers,

115 and is packaged and released from infected cells into small EVs (19). LMP1 activates several  
116 signaling pathways such as the JAK/STAT, MAPK, and NF- $\kappa$ B pathways which have been  
117 shown to upregulate PD-L1 expression as well and are known to be commonly constitutively  
118 activated in a multitude of cancers (19). Here we demonstrate the enrichment of PD-L1 in MVs  
119 in response to levels of LMP1 and clarify localization, co-immunoprecipitation, and the  
120 regulation of these MVs in response to LMP1 levels.

121

## 122 **Results:**

### 123 **PD-L1 levels are elevated in MVs from NPC cells with LMP1 expression.**

124 EBV infected cells have different expression of viral transcriptional programs referred to as  
125 latency I, II, and III. EBV Latency II, was originally identified in biopsies of NPC, which was  
126 characterized by the co-expression of LMP1, LMP2, and EBNA1 transcripts (20). NPC tissues  
127 expressing LMP1 are significantly associated with poor overall survival in NPC patients and  
128 lymph node metastasis (21, 22). We decided to investigate two different NPC cell lines with  
129 varying levels of LMP1. In the first model, an EBV-negative nasopharyngeal carcinoma cell line  
130 (HK1) was compared to HK1 containing a GFP-tagged LMP1 tetracycline-inducible system  
131 (HK1 LMP1). The HK1 LMP1 cells were treated with doxycycline to activate LMP1 expression  
132 (Fig. 1 A). Additionally, to investigate PD-L1 expression in the context of lower stable  
133 expression of LMP1, EBV-negative nasopharyngeal carcinoma (HNE-1) cells were used. HNE-  
134 1 cells were transduced with a vector control (pBabe) or hemagglutinin (HA)-tagged LMP1  
135 retroviral vector (HNE-1 pBabe LMP1) that constitutively expresses low levels of LMP1 (Fig. 1  
136 B). LMP1 expression was detectable in the HNE-1 pBabe LMP1 but notably lower than the  
137 HK1 LMP1 inducible model. The lower levels of LMP1 have been previously reported to

138 closely exhibit expression patterns found in EBV-infected cell lines (23). We harvested the cell  
139 lysates, apoptotic bodies (2K), microvesicles (10K), and small EVs (100K), and analyzed them  
140 by immunoblot (24). The results showed an increase in PD-L1 levels with elevated levels of  
141 LMP1, with PD-L1 noticeably enriched within the MV subpopulation of EVs compared to small  
142 EVs and apoptotic bodies (Fig 1.A and B). Quantification of the levels of LMP1 and PD-L1  
143 specifically in the MV subpopulation normalized to levels of (HK1 and HNE-1) showed a  
144 significant increase in PD-L1 and LMP1 in the MVs of the NPC cell lines expressing LMP1  
145 compared to the wild type cell lines with no LMP1 (Fig. 1C and D). Quantification also  
146 demonstrated higher PD-L1 expression in the MVs compared to the other two subpopulations  
147 of EVs as seen in (Fig. 1 E and F). In conclusion, these results further support the correlation  
148 between LMP1 expression and increased PD-L1 being released from the cell in association  
149 with MVs.

150 **PD-L1 is upregulated at the transcriptional level in LMP1 expressing cells and detected**  
151 **in MVs.**

152 To further understand whether PD-L1 is also being impacted at an mRNA level due to LMP1  
153 expression, RT-qPCR was performed on cells and MVs from both HK1 wild type cells and HK1  
154 LMP1 induced cells. HK1 LMP1 containing cells significantly increased the expression of PD-  
155 L1 and EV biogenesis related genes (CD9, CD63, CD81, Sytenein-1, and HRS) compared to  
156 HK1 cells (Fig. 2A). Interestingly, LMP1 expression did not influence the mRNA levels of PD-  
157 L1 in MVs but did have significantly higher levels of CD9, CD63, CD81, Syntenin-1, and HRS  
158 mRNA when compared to HK1 (Fig. 2B). CD9, CD63 and CD81 are endosome-specific  
159 tetraspanins that are enriched in exosome (samall EV) membranes. CD63 has been found to  
160 regulate EBV LMP1 exosomal packaging (18) and HRS and Syntenin-1 have previously been

161 shown to induce EV formation through EBV LMP1 (25). Altogether, this data suggests that PD-  
162 L1 is upregulated at the transcriptional level in LMP1 expressing cells but the level of mRNA  
163 transcripts in the MVs remain unchanged.

164

#### 165 **Characterization of MVs from NPC cells.**

166 MVs are characterized as being within the 100 to few micrometers size range (26). In order to  
167 confirm size range of these MVs harvested from NPC cells with or without LMP1, Transmission  
168 Electron microscopy (TEM) imaging was performed. Both the HK1 and HK1 GFP LMP1  
169 inducible MV subpopulations were visualized to be around 200nm and exhibited similar  
170 phenotypes under the microscope, as seen in (Fig. 3A and B). Additionally, nanoparticle  
171 tracking was performed to further validate the EM results and to identify differences in MVs  
172 harvested from NPC cells expressing LMP1 compared to wild type NPC cells. The tracking  
173 data in (Fig. 3C) revealed that there was a significant increase in particles/ml for the MVs  
174 harvested from the high expressing LMP1 NPC cell line compared to the wild type cell line,  
175 however, there was no significant difference in particles/cell between the two cell lines (Fig.  
176 3D). This is different than what was previously observed for enhancement of small EV  
177 production due to LMP1 expression (27). The reasoning to why increased particles per ml is  
178 observed could be due to the fact that NPC cells expressing LMP1 grow at a faster rate than  
179 the wild type cells resulting in more MVs being released per ml of media. Both the mean and  
180 mode size of the MVs secreted from the high LMP1 expressing cell line was significantly  
181 increased compared to wild type MVs (Fig. 3E and F). This led us to question whether these  
182 larger secreted MVs carry more protein cargo. The tracking and protein analyses revealed that  
183 the MVs from the high expressing LMP1 cell line had a significant increase in total protein



184 content compared to the wild type MVs (Fig. 3F). The nanoparticle tracking data suggests that  
185 there are not more MVs secreted per cell in the high expressing LMP1 cells but there is more  
186 protein per MV. Therefore, cells expressing LMP1 secrete larger MVs with increased protein  
187 content that may alter the immune response within the infected microenvironment.

#### 188 **PD-L1 is enhanced on the surface of MVs due to LMP1.**

189 PD-L1 has previously been reported to be expressed on the surface of small EVs similar to cell  
190 surface PD-L1 membrane topology, in which the extracellular domain of PD-L1 is surface  
191 exposed (28). PD-L1 extracellular exposure is required for it to exert its immunosuppressive  
192 effects, since PD-L1 needs to be exposed on the surface to bind to its receptor PD-1 which is  
193 found on cytotoxic T cells. Flow cytometry on MVs from HK1 wild type cells and HK1 LMP1  
194 induced cells expressing LMP1 was done. The MVs from both cell lines were incubated with  
195 surface PD-L1 antibody or isotype control. Flow cytometry analyses revealed elevated surface  
196 PD-L1 expression in the MVs from HK1 GFP tagged LMP1 (green) compared to the MVs from  
197 the HK1 wild type cells (blue) (Fig. 4A). In order to further understand PD-L1 localization on  
198 these MVs, scanning transmission electron microscopy (STEM) was undertaken to observe  
199 the MVs after immunogold labelling of PD-L1 with antibodies that specifically bind to PD-L1 on  
200 the extracellular domain. Upon examination of both the prepared EM grids, gold labelling of  
201 PD-L1 was only observed on the HK1 LMP1 MVs (Fig. 4B and C). Quantification of gold  
202 particles per MV revealed a significant increase in gold particles in the HK1 LMP1 MVs  
203 compared to the wild type MVs (Fig. 4D). Research has shown PD-L1 localization to be on the  
204 surface of small EVs; however, more current studies have found PD-L1 to be present on both  
205 the surface and within small EVs (29). To further understand PD-L1 localization within the MV,  
206 a protease protection experiment was done using two different PD-L1 antibodies. For this

207 experiment, Syntenin and CD71 were used as the positive and negative controls, respectively.  
208 Syntenin is a cytosolic adaptor located within EVs that binds to the intracellular domain (ICD)  
209 of syndecans (30), and CD71 is a transferrin receptor found on the surface of EVs. In (Fig. 4E),  
210 a PD-L1 antibody that recognizes endogenous levels of PD-L1 showed a decrease in band  
211 size upon the addition of trypsin. In (Fig. 4F) a PD-L1 antibody that recognizes the extracellular  
212 domain of PD-L1 was used, and upon trypsin addition little PD-L1 is observed. This reveals  
213 that there is some PD-L1 surface exposure on these MVs secreted from high LMP1 expressing  
214 cells; however, some PD-L1 may also be present inside MVs or is resistant to Trypsin  
215 cleavage. Taken together, LMP1 seems to play a role in increasing PD-L1 exposure to the  
216 surface of MVs which may influence the immunosuppressive effects of MVs released from  
217 EBV infected cells.

#### 218 **LMP1 and PD-L1 localize within the same MV subpopulation.**

219 LMP1 and PD-L1 have previously been demonstrated to be expressed on small EVs (28, 31).  
220 Here, we aimed to investigate whether LMP1 was present in PD-L1 positive MVs following  
221 LMP1 induction of NPC cells. First, Optiprep density gradient purification of MVs was  
222 performed. This technique uses iodixanol and ultra-centrifugal force to further purify EV  
223 subpopulations into fractions based on their buoyant density (24) . This can be used to  
224 determine the exact density and fractions within the MV pellet that contain PD-L1 and whether  
225 it co-migrates with LMP1 in the gradient. MVs were harvested from doxycycline-treated HK1  
226 GFP-LMP1 tetracycline-inducible cells and separated by density. The vesicles were purified on  
227 an iodixanol density gradient to separate larger MV subpopulation according to the method of  
228 Kowal et al (24). Two major populations of vesicles were observed in fractions 3 (F3) and 5  
229 (F5) of the gradients, corresponding to densities 1.115 g/mL (third fraction = F3) and 1.145

230 g/mL (fifth fraction = F5) of iodixanol. MV subpopulations, F3 and F5 have previously been  
231 determined to be enriched with specific proteins. F3 usually contains unique ribosome and  
232 proteasome proteins with F5 containing more mitochondrial and ER proteins (24). In these  
233 experiments, F3 and F5 MV subpopulation of EVs were enriched for protein markers LMP1,  
234 PD-L1, and Caveolin-1 (Fig. 5A). LMP1 is present in both small EVs and larger shed  
235 microvesicles (31, 32). Furthermore, we demonstrate the co-migration of LMP1 and PD-L1 in  
236 fractions 3, 4 and 5. Fractions 3 and 5 were enriched with LMP1, PD-L1 and Caveolin-1 more  
237 so than the other fractions indicating that both LMP1 and PD-L1 co-migrate within the same  
238 density fractions in MVs. If LMP1 is present in PD-L1 positive MVs, then MVs immuno-  
239 precipitated with PD-L1 specific antibodies should contain LMP1. To test this, MVs were  
240 harvested from cells expressing LMP1 and recovered by the addition of anti-PD-L1 antibody.  
241 Ten percent of the MV input sample was used to compare to the PD-L1 immuno-precipitated  
242 MVs. Immunoblot analysis further revealed LMP1 to be present in the PD-L1 pulldown (Fig.  
243 5B). EGFR was also pulled down in these PD-L1 positive MVs which was interesting since it  
244 has been recently demonstrated that EGFR activity can control PD-L1 surface presentation in  
245 breast cancer cells (33). Together, this data suggests that LMP1 and PD-L1 are likely in the  
246 same MV population (mostly in fractions 3 and 5) and are localized to the same vesicle within  
247 MVs.

#### 248 **LMP1 and PD-L1 colocalize in NPC cells and are enriched in lipid rafts.**

249 NPC cells have enhanced levels of PD-L1 fluorescence expression in cells that are EBV+  
250 compared to EBV- (34). Based on the above, it was hypothesized that LMP1 might be  
251 responsible for this observation possibly even altering PD-L1 subcellular localization. Similarly,  
252 the results from (Fig. 6A-E) demonstrate enhanced PD-L1 expression and perinuclear

253 colocalization with LMP1 in two different NPC cell lines (HK1 and HNE-1). Maximum intensity  
254 orthogonal projections of Z-stack colocalization images demonstrate PD-L1 and LMP1  
255 perinuclear localization in live and fixed cell images (Fig. 6A and C). HNE-1 cells were  
256 transfected with RFP-tagged LMP1 and GFP-tagged PD-L1 and were examined by live cell  
257 confocal microscopy. The cells exhibited a distinct punctate perinuclear signal for LMP1 and  
258 PD-L1 (Fig. 6A). To confirm these results with endogenous levels of PD-L1 expression, and to  
259 understand what LMP1 does to PD-L1 localization within the cell, fixed cell imaging was done  
260 for HK1 LMP1 cells that were induced and un-induced with doxycycline. As seen in (Fig. 6B),  
261 PD-L1 is mostly localized perinuclearly when LMP1 is present. It seems to aggregate to one  
262 side of the cell in accordance to where LMP1 is also being accumulated. However, in the un-  
263 induced images lacking LMP1, PD-L1 was found to be mostly dispersed throughout the cell  
264 rather than localized within a sub-region like when LMP1 is present (Fig. 6C). Pearson's  
265 correlation coefficient between LMP1 and PD-L1 in the HNE-1 transfected cells and the  
266 induced HK1 LMP1 cells, was around 0.7 and 0.8 respectively, indicating a strong correlation  
267 between these two variables (Fig. 6B and D). Additionally, CTCF values were calculated for  
268 HK1 LMP1 cells with and without doxycycline and showed very high significance in levels of  
269 PD-L1 fluorescence in the doxycycline induced HK1 LMP1 cells compared to the un-induced  
270 (Fig. 6E).

271 LMP1 accumulates in lipid raft microdomains within the cell to engage signaling pathways (35).  
272 Lipid rafts are distinct lipid domains enriched in cholesterol and glycosphingolipids that are  
273 involved in many roles which include but are not limited to signal transduction, membrane  
274 trafficking and the lateral compartmentalization of molecules at the cell surface (35, 36). Both  
275 viruses and MVs emerge from the plasma membrane at lipid raft organizing centers indicating

276 a similar mechanism of biogenesis (14). The formation of MVs involves the transport of specific  
277 cargo to the plasma membrane, lipid membrane redistribution and finally a form of vesicle  
278 pinching off upon reaching the membrane which leads to the release of the vesicle (12). To  
279 test whether PD-L1 also accumulates in membrane microdomains, lipid rafts were isolated  
280 from wild type HK1 or HK1 LMP1 cells following induction of LMP1 based on their detergent-  
281 resistant biochemical properties and analyzed by immunoblot. In both cell lines raft isolates  
282 were enriched in lipid raft scaffolding protein Caveolin-1 (37). The adaptor protein Syntenin-1  
283 was probed for since it is required for efficient LMP1 EV incorporation (25). As seen in (Fig.  
284 6F), LMP1 and PD-L1 are enriched in lipid rafts; however, very little PD-L1 is present in wild  
285 type HK1 cells or rafts lacking LMP1. Based on this data, we conclude that PD-L1 is not only  
286 enhanced by LMP1 at the cellular level but also shifts PD-L1 localization from dispersed  
287 throughout the cell to colocalizing with LMP1 at perinuclear regions within the cell; additionally,  
288 PD-L1 and LMP1 may share a similar lipid raft associated mechanism of MV incorporation.

289

## 290 **Discussion:**

291 In this study, we examined the impact of EBV oncoprotein LMP1 on MV associated PD-  
292 L1 levels using a number of techniques. LMP1 has previously been found to contribute  
293 to immune evasion strategies and protect virus infected cells through the activation and  
294 upregulation of multiple immune-associated proteins (38). Moreover, LMP1 modified  
295 EVs are found to contribute to tumor progression through shaping the tumor  
296 microenvironment by enhancing tumor cell growth, migration, invasion, and suppressing  
297 the anti-tumor host response (39). LMP1 from infected cancer cells accumulate in small  
298 EVs (40). Numerous observations indicate that full-length LMP1 protein is secreted from

299 the cell in larger EVs shed from the cell surface called microvesicles (MVs) (41). The  
300 release of LMP1 from the cell through EV pathways has been suggested as a method of  
301 escape from degradation and cell-to-cell transmission of LMP1 and associated proteins  
302 (2, 3).

303 Recently, LMP1 has been found to regulate PD-L1 expression at the cellular level  
304 through STAT3, AP-1, and NF- $\kappa$ B pathways (34). Cytokines such as tumor necrosis  
305 factor- $\alpha$  (TNF- $\alpha$ ), interferon- $\gamma$  (IFN- $\gamma$ ), and interleukin 4 (IL-4) upregulate PD-L1  
306 expression through the STAT and NF- $\kappa$ B pathways (43–45). IFN- $\gamma$  also has been shown  
307 to have a synergetic effect with LMP1 in up-regulating PD-L1 in NPC (34). PD-L1  
308 upregulation has been implicated in numerous roles with regards to immune  
309 suppression (28, 43, 44). Constitutive expression of PD-L1 on tumor cells is an innate  
310 immunity mechanism activated by several pro-survival pathways: MAPK (45),  
311 ATM/ATR/Chk1 (46), JAK/STAT (43), and PI3/AKT(44); or by genetic aberrations such  
312 as CDK5 disruption (47), loss of PTEN (48), or truncation of the 3'-UTR that stabilizes  
313 an increase in PD-L1 transcripts (49). However, constitutive expression of PD-L1 is far  
314 less common than IFN induced PD-L1 expression. PD-L1 is expressed in various  
315 cancers: gastric cancer (50), melanoma (51), nasopharyngeal carcinoma (52), post-  
316 transplant lymphoproliferative disorder (53), non-small cell lung cancer (54), pancreatic  
317 cancer (55), lymphomas (56), bladder cancer (57), kidney cancer (58), breast cancer  
318 (59), and Hodgkin lymphoma (60) . Other than EBV, multiple human herpes virus  
319 infections have also been found to result in increased PD-L1 expression such as herpes  
320 simplex virus (61), Varicella zoster virus (62), Cytomegalovirus (63), Human herpesvirus  
321 6 (64), and Kaposi's sarcoma-associated herpesvirus (65). Interestingly, in addition to

322 human herpes viruses, infection with human immunodeficiency virus (HIV), influenza  
323 virus, Ebola virus, and adenovirus also leads to elevated PD-L1 expression (66), (67).  
324 Altogether, the wide array of diseases viral and non-viral, that are associated with  
325 increased PD-L1 expression emphasizes the need for elucidating the mechanism of  
326 pathway regulation, activation, and localization of PD-L1.

327 In immune competent hosts, EBV efficiently infects B lymphocytes, this initiates a strong  
328 cytotoxic T cell response against lytic and latent antigens, leading to the expansion of  
329 EBV-transformed B cells. To establish and maintain latency, EBV has adopted many  
330 immune evasion mechanisms. To further understand the function of PD-L1 in EBV  
331 related cancers in response to EBV viral oncogene LMP1, we characterized the  
332 subpopulations of extracellular vesicles expressing PD-L1 following LMP1 expression.  
333 In our experiment we determined PD-L1 enrichment in MVs in response to LMP1 levels  
334 in both a high LMP1 expressing cell line construct (HK1 GFP-tagged inducible LMP1)  
335 and by a LMP1 expressing cell line (HNE-1 pBabe LMP1) which constitutively  
336 expresses lower levels of LMP1, similar to levels found in EBV infected cells. It was  
337 observed that LMP1 and PD-L1 accumulated in a subpopulation of EVs called MVs.  
338 Additionally, we determined that the upregulation of PD-L1 in the MV subpopulation was  
339 in response to EBV LMP1. MVs from NPC cells were confirmed through size, density  
340 and the detection of MV markers. Flow cytometry analyses indicated an approximately  
341 10-fold increase in PD-L1 associated MVs from the NPC cell line expressing LMP1  
342 compared to the wild type. LMP1 upregulated the cellular expression of PD-L1 at the  
343 transcriptional level; however interestingly, PD-L1 mRNAs were detected in MVs. PD-L1  
344 is post-transcriptionally regulated in an indirect way through TNF $\alpha$ -activated NF- $\kappa$ B (68).

345 LMP1 is a CD40 receptor mimic that constitutively activates NF- $\kappa$ B (69, 70). This  
346 depicts a mechanism in which PD-L1 is possibly being upregulated at the transcriptional  
347 level in MVs through the activation of NF- $\kappa$ B by LMP1.

348 Moreover, we demonstrate that LMP1 expression in NPC cells results in total elevated  
349 levels of EV secretion and enhanced packaging of proteins within the MV. One possible  
350 explanation for the increase in protein per MV may be that EVs released from virally  
351 infected cells can package more proteins involved in suppressing the immune response  
352 toward the virus and consequently enhancing viral spread. LMP1 also appears to play a  
353 role in enhancing PD-L1 surface exposure in MVs. Enhanced PD-L1 surface levels  
354 could depict the mechanism in which LMP1 contributes to immune suppression by  
355 enhancing PD-L1-PD-1 interaction and T cell inactivation. LMP1 and PD-L1 also co-  
356 migrate within the same density gradient, and immuno-isolation of this MV  
357 subpopulation confirmed the presence of LMP1 in PD-L1 containing vesicles from an  
358 LMP1 expressing NPC cell line. EGFR was also immuno-isolated within the same MV  
359 with LMP1 and PD-L1. Recently, EGFR has been found to play a vital role in  
360 upregulating PD-L1 once activated, mediating immune escape in non-small cell lung  
361 cancer (71). LMP1 signaling occurs through localization in lipid rafts and by recruiting  
362 key signaling components to internal lipid raft containing membranes (35, 72). Our  
363 observations indicate that both LMP1 and PD-L1 colocalize perinuclearly within the cell  
364 and are enriched in lipid rafts which suggests a similar signaling platform between these  
365 two proteins, bringing together numerous signaling components that drive immune  
366 evasion mechanisms, and facilitates their interaction. These findings lead us to  
367 conclude that LMP1 might have different roles in different subpopulations of EVs, and



368 that LMP1 modified MVs may act as an instrumental component contributing to immune  
369 suppression and evasion of EBV viral infected cells, by the enhanced packaging of  
370 proteins into these MVs, with one of them being PD-L1.

371 Altogether, the above data suggests that EBV+ related diseases are largely dependent  
372 on PD-L1 for disease progression and possibly immune protection, and identifies a  
373 more specific target for treating these diseases. Therefore, any immunotherapy  
374 treatments targeted at disrupting this pathway could lead to better outcomes for patients  
375 suffering from EBV related diseases. One form of treatment for cancers that induce PD-  
376 L1 expression is immunotherapy which serves to boost the immune antitumor response  
377 and has fewer side effects than alternative cancer therapies, such as chemotherapy,  
378 surgery, and radiation. FDA approved antibodies pembrolizumab (73) and nivolumab  
379 (74) that target PD-1 and atezolizumab (75) that targets PD-L1, improve survival against  
380 Hodgkin's lymphoma (73, 75). Anti-PD-1 antibody is effective in several other cancers,  
381 such as glioblastoma (76), and metastatic melanoma (28). In addition to cancer, anti-  
382 PD-1/PD-L1 treatment has also been considered as a possible treatment for patients  
383 with dementia and Alzheimer's (77). Moreover, monoclonal antibodies targeting PD-1 or  
384 PD-L1 are now in phase I-II trials as a therapeutic treatment for patients with  
385 metastatic/recurrent NPC (78). Using anti-PD-1 or anti-PD-L1 ligands alone is usually  
386 insufficient. Unfortunately, using several immune blockade therapies increases the  
387 patient's likelihood of experiencing unwanted side effects (79).

388 Now that EBV's role in the regulation of PD-L1 has been established, exploring other  
389 viral functions that might be inducing MV associated PD-L1, such as EBV microRNAs,

390 EBNA-1/2, and LMP1/2A should be investigated. Targeting both LMP1 and PD-L1  
391 expressing MVs and small EVs in EBV+ tumors might lead to a synergistic inhibitory  
392 effect on tumor growth and metastasis. Identifying post-treatment levels of MV levels of  
393 PD-L1 with anti- PD-L1 blockade therapy could help distinguish patients who respond to  
394 this specific type of therapy early on. Tumor genomic profiling is therefore necessary in  
395 order to prescribe the most effective treatment that will confer the best results with the  
396 least amount of toxicity and side effects to the patient. Additionally, determining the best  
397 way to overcome PD-L1 blockade resistance and detect/target MV associated PD-L1  
398 are the necessary next steps to take in the PD-L1 therapeutic research domain. These  
399 results highlight the crucial role that MV associated PD-L1 might be playing in creating  
400 an immunosuppressive environment that cancers and possibly other diseases exploit.  
401 As more research on MV associated PD-L1 in EBV related cancers is conducted, its  
402 vital role in facilitating tumor progression can be elucidated.

403 The results from this research contribute to the EV field and PD-L1 immune-targeted  
404 therapies in several ways. Determining that MVs derived from EBV+ cell lines express  
405 PD-L1, identifies a new therapeutic target in immune blockade therapy. Consequently,  
406 determining whether PD-L1 localization is based on cell line, or on levels of LMP1 will  
407 help clarify the mechanisms that promote immune suppression since PD-L1 surface  
408 exposure is necessary for T cell inactivation. The next steps include determining the  
409 immunosuppressive functions of MV surface expressed PD-L1 in EBV related cancers  
410 and determining if they differ from PD-L1 function within small EVs. This  
411 immunosuppressive contribution could equate to exosomal levels of PD-L1 or may play  
412 a more vital role in immune suppression. In conclusion, we expect that our findings will

413 begin to clarify the mechanism of LMP1-mediated enhanced packaging of PD-L1 into  
414 MVs and the functions of LMP1-modified MVs. In terms of clinical applications, it could  
415 also serve as a potential therapeutic target or diagnostic biomarker for identifying  
416 whether or not the patient will respond well to immunotherapy treatment and predict  
417 tumor responses.

418

## 419 **Materials and Methods:**

### 420 **Retrovirus production.**

421 Retrovirus particles for transduction and stable cell generation were produced in HNE-1  
422 cells following JetPrime transfection of expression plasmids (pBabe neo, pBabe-HA-  
423 LMP1 neo) and packaging plasmids pMD2.G (Addgene; number 12259; a gift from  
424 Didier Trono) and PSPAX2 (Addgene; number 12260; a gift from Didier Trono)  
425 according to the manufacturer's instructions (Polyplus). Medium was collected at 48, 72,  
426 and 96 h post-transfection, centrifuged for 10 min at 1,000 × *g*, filtered through a 0.45-  
427 μm filter, and frozen at -80°C until use. Stable HNE1 cell lines expressing pBabe-HA-  
428 LMP1 were created by retrovirus transduction as described above and were selected  
429 and maintained in 1 mg/ml of G418 sulfate.

### 430 **Generation of GFP-LMP1-inducible cells**

431 HK1 cells that stably express GFP-LMP1 under control of a tetracycline-inducible  
432 promoter were created by first being transduced with lentivirus particles containing  
433 pLenti CMV TetR BLAST (Addgene; 17492) as previously described in (18). Stable cells  
434 were selected with medium containing 10 μg/ml of blasticidin (InvivoGen; ant-bl-1) and  
435 then transduced with retrovirus particles containing pQCXP GFP-LMP1. Doubly stable

436 cells were selected with medium supplemented with blasticidin (10 µg/ml) and  
437 puromycin (2 µg/ml) for 2 weeks. LMP1 expression was induced for 24 h with the  
438 addition of doxycycline to a final concentration of 1 µg/ml or 0.5 µg/ml.

#### 439 **Cell culture.**

440 HNE1 cells were cultured in 1:1 mixture of Dulbecco modified Eagle medium (DMEM;  
441 Lonza; 12-604Q) and Ham's F-12. HK1 (a gift from George Tsao, Hong Kong  
442 University). All cell culture Medium was supplemented with 10% fetal bovine serum  
443 (FBS; Seradigm; 1400-500), 2 mM L-glutamine (Corning; 25-005-CI), 100 IU of  
444 penicillin-streptomycin (Corning; 30-002-CI), and 100 µg/ml:0.25 µg/ml  
445 antibiotic/antimycotic (Corning; 30-002- CI). The cells were maintained at 37°C with 5%  
446 CO<sub>2</sub>.

#### 447 **Transient Transfection**

448 HK1 grown in 100 mm plates were transfected with 5 µg of RFP-LMP1 or GFP-PD-L1  
449 plasmid using Lipofectamine 3000 transfection kit (Invitrogen, L3000015). Lipofectamine  
450 reagents were diluted in Opti-MEM medium (Gibco, 31,985–070) and added according  
451 to manufacturer's instructions. Twenty-four hours after transfection, cells were  
452 harvested and lysed in RIPA buffer, as previously described (25, 47). Cell-conditioned  
453 medium was harvested for extracellular vesicle enrichment.

#### 454 **Immunofluorescence assay**

455 Cells were stained as previously described (47). The coverslips were coated with poly-  
456 L-lysine (Sigma; P1955) as according to manufacturer's instructions, then cells were  
457 seeded. The next day, cells had GFP-LMP1 induced using 0.5 µg/ml of doxycycline.  
458 The next day, cells were fixed in 100% ice-cold methanol or 4% paraformaldehyde for

459 10 minutes. Cells were then washed again with PBS 3 times before being permeabilized  
460 with 0.2% Triton-X in PBS. Cells were then placed in a blocking buffer (5% goat serum  
461 in PBS with 0.2% Tween [PBST]) for 30 minutes. Next, cells were stained with primary  
462 antibodies in blocking buffer PD-L1 D8T4X (1:200) for 2 hours. Cells were washed 3  
463 times in PBST then placed in secondary antibody rabbit IgG (A48254; Thermo Fisher)  
464 diluted in the blocking buffer for 1 hour. Cells were washed 3 times with PBST before  
465 being incubated with Red DNA stain (52406; ENZO) diluted in PBS for 10 minutes.  
466 Cells were washed 2 times with PBS, and once with water before being mounted on a  
467 glass slide with mounting medium (4% propyl gallate, 90% glycerol in PBS) for confocal  
468 microscopy imaging. Confocal images were taken using a Zeiss LSM 880 microscope  
469 and processed using Zen 2.1 Black software.

#### 470 **Extracellular-vesicle enrichment.**

471 Extracellular vesicles were harvested from conditioned cell culture media by differential  
472 centrifugation and polyethylene glycol (PEG) precipitation as previously described  
473 (80),(81). Briefly, apoptotic bodies/cell debris (2K), microvesicles (10K), and small EVs  
474 (100K) were harvested from cell-conditioned media by ultra-centrifugation at 2,000 RPM  
475 for 10 min, 10,000 RPM for 30 min, and by the ExtraPEG method respectively.

#### 476 **Protease Protection Experiment**

477 After the washing step the MV pellet is resuspended in a 1:1 ratio of 0.25% trypsin and  
478 particle free PBS and left at 37°C for 30 minutes. This cleaves the surface membrane of  
479 the EV sample. Antibodies: (PD-L1 E1J2J; Cell Signaling) for extracellular domain of  
480 PD-L1, and (PD-L1 E1L3N; Cell Signaling) was used for endogenous levels of PD-L1.  
481 Sample is then resuspended in lysis buffer for immunoblot analysis.

482 **Purification of membrane microdomains**

483 Lipid raft (LR) microdomains were harvested as previously described (82).

484 **Iodixanol density gradient.**

485 EVs from HK1 GFP-LMP1-inducible cells and HNE1-pBabe-HA-LMP1 cells harvested  
486 by centrifugation for 10,000  $\times$  g for 30 min were further purified on a density gradient,  
487 according to the method of Kowal et al. (24). Briefly, EV pellets following the  
488 centrifugation step were re-suspended in 1.5 ml of 0.25 M sucrose buffer (10 mM Tris  
489 [pH 7.4]). A 60% stock (wt/vol) Optiprep (Sigma, D1556) solution was added 1:1 to EV  
490 suspensions and transferred to an MLS-50 rotor tube (Beckman; 344057). Iodixanol  
491 stock was then diluted in 0.25 M sucrose-Tris buffer to make 10% and 20% iodixanol  
492 solutions, and then 1.3 ml of 20% iodixanol and 1.2 ml of 10% iodixanol solutions were  
493 carefully layered on top of EV suspensions. Gradients were centrifuged for 90 min at  
494 maximum MLS-50 rotor speed (268,000  $\times$  g) and separated by collection of 490  $\mu$ l  
495 fractions from the top of the gradient. Densities were measured with a refractometer  
496 (Refracto 30PX). Individual fractions were washed with PBS and re-pelleted by  
497 ultracentrifugation in an SW41 Ti rotor at 100,000  $\times$  g for 2 h. Pellets were resuspended  
498 in particle-free PBS for NTA or strong urea-containing lysis buffer for immunoblot  
499 analysis.

500 **Immunoblot analysis.**

501 To prepare cell lysates, cells were washed and then scraped into cold PBS and  
502 collected by centrifugation at 1,000  $\times$  g for lysis in radio immune precipitation assay  
503 (RIPA) buffer (20 mM Tris-HCl, 50 mM NaCl, 1% NP-40, 0.1% SDS, 0.5%  
504 deoxycholate) with 1X proteinase inhibitor. EV samples were harvested as described

505 above. To prepare all cell lysates, and EV lysates run under reducing conditions for  
506 SDS-PAGE, additional sample buffer (5x) also containing 0.2 M dithiothreitol (DTT) was  
507 added to samples. Lysates were boiled for 5 min. An equal protein concentration or  
508 equal volume of cell and EV lysate was run in an SDS 10% polyacrylamide gel and  
509 subsequently transferred onto a nitrocellulose membrane (GE Healthcare). Total protein  
510 was measured by Ponceau S stain. Blots were blocked with 5% (wt./vol.) nonfat dry milk  
511 powder in Tris-buffered saline with Tween 20 (TBS-T). Blots were probed with primary  
512 antibodies against the following: PD-L1 (E1L3N; Cell Signaling), Syntenin-1 (S-31;  
513 Santa Cruz), HSC70 (B-6; Santa Cruz), Caveolin-1 (D46G3; Cell Signaling), CD63  
514 (TS63; Abcam), LMP1 (CS1-4; Dako), CD81 (B399; GeneTex), CD9 (CBL162;  
515 Millipore), CD71 (D7G9X; Cell Signaling), EGFR (SC-03; Santa Cruz). Blots were  
516 subsequently probed with the following horseradish peroxidase (HRP)-conjugated  
517 secondary antibodies: rabbit anti-mouse IgG (Genetex; 26728), or anti-mouse kappa  
518 light chain (H139-52.1; Abcam). Blots were imaged using an ImageQuant LAS4000  
519 (General Electric) and processed with ImageQuant TL v8.1.0.0 software, Adobe  
520 Photoshop CS6, and Adobe illustrator.

### 521 **Nanoparticle tracking.**

522 Nanoparticle tracking analysis (NTA), a technology used to quantify nanoparticle  
523 concentrations and sizes consistent with EV populations, was used to determine  
524 increases in vesicle secretion and confirm size range of EV pellets following PD-L1  
525 expression in cells. Following EV enrichment, vesicles were resuspended in particle-  
526 free PBS for quantitation using a Malvern NanoSight LM10 instrument as previously  
527 described in detail (83)(81). The camera level was set to 13, and the threshold was

528 maintained at 3 for all samples. The quantity of particles measured by NTA was  
529 normalized to the number of live cells counted at the time of harvest to generate a  
530 measure of the number of EVs secreted per cell. For nanoparticle tracking experiments,  
531 live cells were counted with an automated cell counter (Cellometer Vision, software  
532 version 2.1.4.2; Nexcelom Biosciences) at the time of harvest by staining with a 0.2%  
533 final concentration of trypan blue (Sigma; T8154) in phosphate-buffered saline (PBS) in  
534 a 1:1 ratio. Relative vesicle secretion was obtained by normalization of EV levels to  
535 control cells in each experiment.

#### 536 **Transmission electron microscopy.**

537 Following enrichment of EVs by the ExtraPEG method, pellets were resuspended in 100  
538  $\mu$ l of particle-free PBS for electron microscopy imaging. Samples were prepared as  
539 described by Lässer et al. (84) and visualized on an FEI CM120 transmission electron  
540 microscope. For immunogold labelling, EV pellet was resuspended in anti-PD-L1  
541 antibody (D8T4X; Cell Signaling) (1:60) in blocking buffer (1% BSA in PBS) for 2 hours.  
542 The EV suspensions were applied to formvar/carbon-coated nickel grids 200 mesh for 3  
543 min. Then grids were washed with 5 separate drops (50  $\mu$ l, 10 min per drop) of PBS  
544 with 0.1% BSA. Transferred a drop of the secondary antibody conjugated to 10 nm gold  
545 particle (Goat F(ab')<sub>2</sub> Anti-Rabbit IgG H&L (10nm Gold; ab39601) (1:100 in PBS with  
546 0.1%BSA) to grids for 1 hour. Repeat washing steps. Next wash with 2 separate drops  
547 of fresh MilliQ. Finally, negative stain with uranyl acetate for 1 min.

#### 548 **Live cell imaging.**

549 HNE-1 cells were seeded into 35-mm glass well plates (Greiner Bio-One; number  
550 627860), co-transfected 24 h later with 1  $\mu$ g of GFP tagged PD-L1 and RFP tagged



551 LMP1, and imaged 24 h post transfection using a Zeiss LSM 880 microscope with a  
552 live-cell imaging chamber. Hoechst 33342 nuclear staining (5 µg/ml; Thermo Scientific;  
553 number 62249) was added 15 min prior to imaging. Confocal images were taken and  
554 processed using Zen 2.1 Black software.

### 555 **Immunoprecipitation**

556 The MV sample obtained after centrifugation was resuspended in 1%BSA in PBS. 100  
557 µl of magnetic G beads were washed 3 times with (0.1%BSA in PBS). Rabbit (DA1E)  
558 mAb IgG XP® Isotype Control or PD-L1 (Extracellular Domain Specific) (D8T4X)  
559 antibodies were diluted in PBS with 0.1% BSA and then mixed with 1.0 µg magnetic  
560 beads. The antibodies and magnetic beads were incubated with rotation for 20 min at  
561 room temperature. This was followed by three washes with 0.1% BSA in PBS. The  
562 Microvesicle sample was then added to the beads and left in the cold room for 3 hours  
563 with rotation. This was followed by another three washes with 0.1% BSA in PBS.  
564 Resuspended in 2x reducing buffer and then heat for 7 min at 90 °C before running on  
565 gel for immunoblot analysis.

### 566 **Flow cytometry**

567 Microvesicles from HK1 or HK1-LMP1 cell were first blocked with flow buffer (1% BSA  
568 in PBS) stained with either isotype control Ig or anti-PDL1 at 2g/mL for one hour at 4 °C.  
569 After wash with flow buffer, samples were stained with PE conjugated anti-rabbit  
570 antibody at 4 °C for 30 mins. Wash to remove unbound antibodies, samples were run on  
571 FACSC onto flow cytometer (BD) in Translational lab College of Medicine FSU. The  
572 data were analyzed by FACSDiva software (BD).

### 573 **RNA Isolation and Reverse Transcription**

574 Total RNA of cell or EV samples were isolated by Trizol reagent (ThermoFisher,  
 575 15596018) and quantified by nanodrop. Less than 1 µg of total RNA was used for  
 576 reverse transcription by qScript cDNA SuperMix (Quantabio, 95048). CDNAs were store  
 577 in -20°C until further use.

### 578 Quantitative Real-Time PCR and Data analysis

579 Standard 3-step cycles protocol (40 cycles of 95 °C for 5 s, 60 °C for 10 s, 72 °C for 20 s)  
 580 was used in all qPCR reactions. PerfeCTa SYBR Green FastMix (Quantabio, 95072-  
 581 012), assay primers (250 nM) and cDNA (1.0 µL) of cell or EV were prepared in 20 µL  
 582 reaction and run on CFX96 qPCR machine (Bio-Rad). Gene expression level were first  
 583 normalized to housekeeping gene GAPDH and then calculated with  $\Delta\Delta C_t$  method.

584 qPCR primer sequence:

| Gene ID<br>(Aliases)           | Sequence                 | Reference Primer<br>Bank ID                        |
|--------------------------------|--------------------------|----------------------------------------------------|
| <b>GAPDH</b>                   | GGAGCGAGATCCCTCCAAAAT    | 378404907c1                                        |
|                                | GGCTGTTGTCATACTTCTCATGG  |                                                    |
| <b>CD274</b><br><b>(PD-L1)</b> | CCTACTGGCATTGCTGAACGCAT  | PNAS December 30,<br>2008 105 (52) 20852-<br>20857 |
|                                | ACCATAGCTGATCATGCAGCGGTA |                                                    |
| <b>CD9</b>                     | TTCCTCTTGGTGATATTCGCCA   | 319738657c2                                        |
|                                | AGTTCAACGCATAGTGGATGG    |                                                    |
| <b>CD63</b>                    | CAGTGGTCATCATCGCAGTG     | 91199544c1                                         |
|                                | ATCGAAGCAGTGTGGTTGTTT    |                                                    |
| <b>CD81</b>                    | TTCCACGAGACGCTTGACTG     | 62240999c2                                         |
|                                | CCCGAGGGACACAAATTGTTC    |                                                    |

|                                     |                         |             |
|-------------------------------------|-------------------------|-------------|
|                                     |                         |             |
| <b>SDCBP</b><br><b>(Syntenin-1)</b> | TGGCTCCTGTA ACTGGTAATGA | 55749522c2  |
|                                     | CTCAGACCAACCAATGAGGCT   |             |
|                                     |                         |             |
| <b>HRS</b>                          | AACGACAAGAACCCACACGTC   | 315138978c2 |
|                                     | GGCCTGGATCAGGTACAGGA    |             |

585

## 586 **Data and statistics analysis**

587 Statistical analysis was performed using the GraphPad Prism 8 (GraphPad Software, San  
588 Diego, CA) or Microsoft Excel with a significant threshold of  $p \leq 0.05$ . Pearson correlation  
589 coefficient (PCC) was determined using an ImageJ colocalization plugin, with a minimum of 10  
590 cells analyzed. The ImageJ software (NIH) was used to calculate the CTCF by applying this  
591 formula: CTCF = integrated density (indicated by the software)-(Area of selected cell x Mean  
592 fluorescence of background readings), as previously described (85). Statistical significance of  
593 results was evaluated by unpaired t test with Welch's correction. Figures were constructed using  
594 Adobe illustrator.

## 595 **Acknowledgments**

596 We would like to thank Dingani Nkosi and Sara York with their help on experiments and  
597 useful discussions. Special thanks to Yah Xin at the National High Magnetic Field  
598 Laboratory for help obtaining electron microscopy images and the FSU College of  
599 Medicine Confocal Microscopy Laboratory. This research was supported by a grant  
600 from the National Cancer Institute of the National Institutes of Health (RO1CA204621)  
601 awarded to D.G.M.

602 **Author Contributions:** Conceptualization, M.A. and D.G.M.; data curation, M.A. and  
603 L.S.; funding acquisition, D.G.M.; investigation, M.A. and L.S. methodology, M.A., L.S.  
604 and D.G.M; project administration, D.G.M.; software, M.A. and L.S.; supervision,  
605 D.G.M.; writing—original draft, M.A.; writing—review and editing, D.G.M. and L.S. All  
606 authors have read and agreed to the published version of the manuscript.

### 607 **Conflict of Interest**

608 The authors report no conflicts of interest. The funders had no role in the design of the  
609 study; in the collection, analyses, or interpretation of data; in the writing of the  
610 manuscript, or in the decision to publish the results.

### 611 **References:**

- 612 1. Young LS, Rickinson AB. 2004. Epstein–Barr virus: 40 years on. 10. Nat Rev Cancer 4:757–768.
- 613 2. Moon P-G, Lee J-E, You S, Kim T-K, Cho J-H, Kim I-S, Kwon T-H, Kim C-D, Park S-H, Hwang D, Kim Y-L,  
614 Baek M-C. 2011. Proteomic analysis of urinary exosomes from patients of early IgA nephropathy  
615 and thin basement membrane nephropathy. PROTEOMICS 11:2459–2475.
- 616 3. Sharpe AH, Wherry EJ, Ahmed R, Freeman GJ. 2007. The function of programmed cell death 1 and  
617 its ligands in regulating autoimmunity and infection. Nat Immunol 8:239–245.
- 618 4. Nakae S, Suto H, Iikura M, Kakurai M, Sedgwick JD, Tsai M, Galli SJ. 2006. Mast cells enhance T cell  
619 activation: importance of mast cell costimulatory molecules and secreted TNF. J Immunol Baltim  
620 Md 1950 176:2238–2248.

- 621 5. Juneja VR, McGuire KA, Manguso RT, LaFleur MW, Collins N, Haining WN, Freeman GJ, Sharpe AH.  
622 2017. PD-L1 on tumor cells is sufficient for immune evasion in immunogenic tumors and inhibits  
623 CD8 T cell cytotoxicity. *J Exp Med* 214:895–904.
- 624 6. Inaguma S, Wang Z, Lasota J, Sarlomo-Rikala M, McCue PA, Ikeda H, Miettinen M. 2016.  
625 Comprehensive immunohistochemical study of programmed cell death ligand 1 (PD-L1). Analysis in  
626 5536 cases revealed consistent expression in trophoblastic tumors. *Am J Surg Pathol* 40:1133–  
627 1142.
- 628 7. Francisco LM, Sage PT, Sharpe AH. 2010. The PD-1 Pathway in Tolerance and Autoimmunity.  
629 *Immunol Rev* 236:219–242.
- 630 8. Bi X-W, Wang H, Zhang W-W, Xia Z, Zhang Y, Wang L. 2016. PD-L1 Is up-Regulated By EBV-Driven  
631 LMP1 through NF- $\kappa$ b Pathway and Correlates with Poor Prognosis in Natural Killer/T-Cell  
632 Lymphoma. *Blood* 128:4134–4134.
- 633 9. Nakayama A, Abe H, Kunita A, Saito R, Kanda T, Yamashita H, Seto Y, Ishikawa S, Fukayama M.  
634 2019. Viral loads correlate with upregulation of PD-L1 and worse patient prognosis in Epstein–Barr  
635 Virus-associated gastric carcinoma. *PLoS ONE* 14.
- 636 10. Ozturk V, Yikilmaz AS, Kilicarslan A, Bakanay SM, Akinci S, Dilek İ. 2020. The Triple Positivity for  
637 EBV, PD-1, and PD-L1 Identifies a Very High Risk Classical Hodgkin Lymphoma. *Clin Lymphoma*  
638 *Myeloma Leuk* <https://doi.org/10.1016/j.clml.2019.11.021>.
- 639 11. Meckes DG, Raab-Traub N. 2011. Microvesicles and Viral Infection. *J Virol* 85:12844–12854.
- 640 12. D’Souza-Schorey C, Clancy JW. 2012. Tumor-derived microvesicles: shedding light on novel  
641 microenvironment modulators and prospective cancer biomarkers. *Genes Dev* 26:1287–1299.

- 642 13. Lee H, Li C, Zhang Y, Zhang D, Otterbein LE, Jin Y. 2019. Caveolin-1 selectively regulates microRNA  
643 sorting into microvesicles after noxious stimuli. *J Exp Med* 216:2202–2220.
- 644 14. Weber EA, Singh MV, Singh VB, Jackson JW, Ture SK, Suwunnakorn S, Morrell CN, Maggirwar SB.  
645 2020. Novel Mechanism of Microvesicle Regulation by the Antiviral Protein Tetherin During HIV  
646 Infection. *J Am Heart Assoc* 9.
- 647 15. Poste G, Nicolson GL. 1980. Arrest and metastasis of blood-borne tumor cells are modified by  
648 fusion of plasma membrane vesicles from highly metastatic cells. *Proc Natl Acad Sci U S A* 77:399–  
649 403.
- 650 16. Valenti R, Huber V, Filipazzi P, Pilla L, Sovena G, Villa A, Corbelli A, Fais S, Parmiani G, Rivoltini L.  
651 2006. Human Tumor-Released Microvesicles Promote the Differentiation of Myeloid Cells with  
652 Transforming Growth Factor- $\beta$ -Mediated Suppressive Activity on T Lymphocytes. *Cancer Res*  
653 66:9290–9298.
- 654 17. Tsai C-Y, Sakakibara S, Yasui T, Minamitani T, Okuzaki D, Kikutani H. 2018. Bystander inhibition of  
655 humoral immune responses by Epstein-Barr virus LMP1. *Int Immunol* 30:579–590.
- 656 18. Hurwitz SN, Nkosi D, Conlon MM, York SB, Liu X, Tremblay DC, Meckes DG. 2017. CD63 Regulates  
657 Epstein-Barr Virus LMP1 Exosomal Packaging, Enhancement of Vesicle Production, and  
658 Noncanonical NF- $\kappa$ B Signaling. *J Virol* 91.
- 659 19. Meckes DG, Shair KHY, Marquitz AR, Kung C-P, Edwards RH, Raab-Traub N. 2010. Human tumor  
660 virus utilizes exosomes for intercellular communication. *Proc Natl Acad Sci* 107:20370–20375.

- 661 20. Brooks L, Yao QY, Rickinson AB, Young LS. 1992. Epstein-Barr virus latent gene transcription in  
662 nasopharyngeal carcinoma cells: coexpression of EBNA1, LMP1, and LMP2 transcripts. *J Virol*  
663 66:2689–2697.
- 664 21. Horikawa T, Sheen TS, Takeshita H, Sato H, Furukawa M, Yoshizaki T. 2001. Induction of c-Met  
665 proto-oncogene by Epstein-Barr virus latent membrane protein-1 and the correlation with cervical  
666 lymph node metastasis of nasopharyngeal carcinoma. *Am J Pathol* 159:27–33.
- 667 22. Chen J, Hu C-F, Hou J-H, Shao Q, Yan L-X, Zhu X-F, Zeng Y-X, Shao J-Y. 2010. Epstein-Barr virus  
668 encoded latent membrane protein 1 regulates mTOR signaling pathway genes which predict poor  
669 prognosis of nasopharyngeal carcinoma. *J Transl Med* 8:30.
- 670 23. Wasil LR, Wei L, Chang C, Lan L, Shair KHY. 2015. Regulation of DNA Damage Signaling and Cell  
671 Death Responses by Epstein-Barr Virus Latent Membrane Protein 1 (LMP1) and LMP2A in  
672 Nasopharyngeal Carcinoma Cells. *J Virol* 89:7612–7624.
- 673 24. Kowal J, Arras G, Colombo M, Jouve M, Morath JP, Primdal-Bengtson B, Dingli F, Loew D, Tkach M,  
674 Théry C. 2016. Proteomic comparison defines novel markers to characterize heterogeneous  
675 populations of extracellular vesicle subtypes. *Proc Natl Acad Sci* 113:E968–E977.
- 676 25. Nkosi D, Sun L, Duke LC, Patel N, Surapaneni SK, Singh M, Meckes DG. Epstein-Barr Virus LMP1  
677 Promotes Syntenin-1- and Hrs-Induced Extracellular Vesicle Formation for Its Own Secretion To  
678 Increase Cell Proliferation and Migration. *mBio* 11:e00589-20.
- 679 26. Sizing and phenotyping of cellular vesicles using Nanoparticle Tracking Analysis | Elsevier  
680 Enhanced Reader.

- 681 27. Ceccarelli S, Visco V, Raffa S, Wakisaka N, Pagano JS, Torrisi MR. 2007. Epstein-Barr virus latent  
682 membrane protein 1 promotes concentration in multivesicular bodies of fibroblast growth factor 2  
683 and its release through exosomes. *Int J Cancer* 121:1494–1506.
- 684 28. Chen G, Huang AC, Zhang W, Zhang G, Wu M, Xu W, Yu Z, Yang J, Wang B, Sun H, Xia H, Man Q,  
685 Zhong W, Antelo LF, Wu B, Xiong X, Liu X, Guan L, Li T, Liu S, Yang R, Lu Y, Dong L, McGettigan S,  
686 Somasundaram R, Radhakrishnan R, Mills G, Lu Y, Kim J, Chen YH, Dong H, Zhao Y, Karakousis GC,  
687 Mitchell TC, Schuchter LM, Herlyn M, Wherry EJ, Xu X, Guo W. 2018. Exosomal PD-L1 contributes  
688 to immunosuppression and is associated with anti-PD-1 response. *Nature* 560:382–386.
- 689 29. Poggio M, Hu T, Pai C-C, Chu B, Belair CD, Chang A, Montabana E, Lang UE, Fu Q, Fong L, Billelloch R.  
690 2019. Suppression of Exosomal PD-L1 Induces Systemic Anti-tumor Immunity and Memory. *Cell*  
691 177:414-427.e13.
- 692 30. Grootjans JJ, Zimmermann P, Reekmans G, Smets A, Degeest G, Dürr J, David G. 1997. Syntenin, a  
693 PDZ protein that binds syndecan cytoplasmic domains. *Proc Natl Acad Sci* 94:13683–13688.
- 694 31. Keryer-Bibens C, Pioche-Durieu C, Villemant C, Souquère S, Nishi N, Hirashima M, Middeldorp J,  
695 Busson P. 2006. Exosomes released by EBV-infected nasopharyngeal carcinoma cells convey the  
696 viral Latent Membrane Protein 1 and the immunomodulatory protein galectin 9. *BMC Cancer*  
697 6:283.
- 698 32. Vazirabadi G, Geiger TR, Coffin lii WF, Martin JM. 2003. Epstein-Barr virus latent membrane  
699 protein-1 (LMP-1) and lytic LMP-1 localization in plasma membrane-derived extracellular vesicles  
700 and intracellular virions. *J Gen Virol* 84:1997–2008.



- 701 33. Monypenny J, Milewicz H, Flores-Borja F, Weitsman G, Cheung A, Chowdhury R, Burgoyne T,  
702 Arulappu A, Lawler K, Barber PR, Vicencio JM, Keppler M, Wulaningsih W, Davidson SM, Fraternali  
703 F, Woodman N, Turmaine M, Gillett C, Franz D, Quezada SA, Futter CE, Von Kriegsheim A, Kolch W,  
704 Vojnovic B, Carlton JG, Ng T. 2018. ALIX Regulates Tumor-Mediated Immunosuppression by  
705 Controlling EGFR Activity and PD-L1 Presentation. *Cell Rep* 24:630–641.
- 706 34. Fang W, Zhang J, Hong S, Zhan J, Chen N, Qin T, Tang Y, Zhang Y, Kang S, Zhou T, Wu X, Liang W, Hu  
707 Z, Ma Y, Zhao Y, Tian Y, Yang Y, Xue C, Yan Y, Hou X, Huang P, Huang Y, Zhao H, Zhang L. 2014. EBV-  
708 driven LMP1 and IFN- $\gamma$  up-regulate PD-L1 in nasopharyngeal carcinoma: Implications for  
709 oncotargeted therapy. *Oncotarget* 5:12189–12202.
- 710 35. Meckes DG, Menaker NF, Raab-Traub N. 2013. Epstein-Barr Virus LMP1 Modulates Lipid Raft  
711 Microdomains and the Vimentin Cytoskeleton for Signal Transduction and Transformation. *J Virol*  
712 87:1301–1311.
- 713 36. Brown DA, London E. 1998. Functions of lipid rafts in biological membranes. *Annu Rev Cell Dev Biol*  
714 14:111–136.
- 715 37. Salzer U, Prohaska R. 2001. Stomatin, flotillin-1, and flotillin-2 are major integral proteins of  
716 erythrocyte lipid rafts. *Blood* 97:1141–1143.
- 717 38. Middeldorp JM, Pegtel DM. 2008. Multiple roles of LMP1 in Epstein-Barr virus induced immune  
718 escape. *Semin Cancer Biol* 18:388–396.
- 719 39. Jabalee J, Towle R, Garnis C. 2018. The Role of Extracellular Vesicles in Cancer: Cargo, Function,  
720 and Therapeutic Implications. *Cells* 7:93.

- 721 40. Verweij FJ, van Eijndhoven MAJ, Hopmans ES, Vendrig T, Wurdinger T, Cahir-McFarland E, Kieff E,  
722 Geerts D, van der Kant R, Neefjes J, Middeldorp JM, Pegtel DM. 2011. LMP1 association with CD63  
723 in endosomes and secretion via exosomes limits constitutive NF- $\kappa$ B activation. *EMBO J* 30:2115–  
724 2129.
- 725 41. Flanagan J, Middeldorp J, Sculley T 2003. Localization of the Epstein–Barr virus protein LMP 1 to  
726 exosomes. *J Gen Virol* 84:1871–1879.
- 727 42. Dukers DF, Meij P, Vervoort MBHJ, Vos W, Scheper RJ, Meijer CJLM, Bloemena E, Middeldorp JM.  
728 2000. Direct Immunosuppressive Effects of EBV-Encoded Latent Membrane Protein 1. *J Immunol*  
729 165:663–670.
- 730 43. Moon JW, Kong S-K, Kim BS, Kim HJ, Lim H, Noh K, Kim Y, Choi J-W, Lee J-H, Kim Y-S. 2017. IFN $\gamma$   
731 induces PD-L1 overexpression by JAK2/STAT1/IRF-1 signaling in EBV-positive gastric carcinoma. *Sci*  
732 *Rep* 7:17810.
- 733 44. Lastwika KJ, Wilson W, Li QK, Norris J, Xu H, Ghazarian SR, Kitagawa H, Kawabata S, Taube JM, Yao  
734 S, Liu LN, Gills JJ, Dennis PA. 2016. Control of PD-L1 Expression by Oncogenic Activation of the AKT-  
735 mTOR Pathway in Non-Small Cell Lung Cancer. *Cancer Res* 76:227–238.
- 736 45. Akbay EA, Koyama S, Carretero J, Altabef A, Tchaicha JH, Christensen CL, Mikse OR, Cherniack AD,  
737 Beauchamp EM, Pugh TJ, Wilkerson MD, Fecci PE, Butaney M, Reibel JB, Soucheray M, Cohoon TJ,  
738 Janne PA, Meyerson M, Hayes DN, Shapiro GI, Shimamura T, Sholl LM, Rodig SJ, Freeman GJ,  
739 Hammerman PS, Dranoff G, Wong K-K. 2013. Activation of the PD-1 pathway contributes to  
740 immune escape in EGFR-driven lung tumors. *Cancer Discov* 3:1355–1363.

- 741 46. Sato H, Niimi A, Yasuhara T, Permata TBM, Hagiwara Y, Isono M, Nuryadi E, Sekine R, Oike T, Kakoti  
742 S, Yoshimoto Y, Held KD, Suzuki Y, Kono K, Miyagawa K, Nakano T, Shibata A. 2017. DNA double-  
743 strand break repair pathway regulates PD-L1 expression in cancer cells. *Nat Commun* 8:1751.
- 744 47. Dorand RD, Nthale J, Myers JT, Barkauskas DS, Avril S, Chirieleison SM, Pareek TK, Abbott DW,  
745 Stearns DS, Letterio JJ, Huang AY, Petrosiute A. 2016. Cdk5 disruption attenuates tumor PD-L1  
746 expression and promotes antitumor immunity. *Science* 353:399–403.
- 747 48. Marzec M, Zhang Q, Goradia A, Raghunath PN, Liu X, Paessler M, Wang HY, Wysocka M, Cheng M,  
748 Ruggeri BA, Wasik MA. 2008. Oncogenic kinase NPM/ALK induces through STAT3 expression of  
749 immunosuppressive protein CD274 (PD-L1, B7-H1). *Proc Natl Acad Sci U S A* 105:20852–20857.
- 750 49. Kataoka K, Shiraishi Y, Takeda Y, Sakata S, Matsumoto M, Nagano S, Maeda T, Nagata Y, Kitanaka  
751 A, Mizuno S, Tanaka H, Chiba K, Ito S, Watatani Y, Kakiuchi N, Suzuki H, Yoshizato T, Yoshida K,  
752 Sanada M, Itonaga H, Imaizumi Y, Totoki Y, Munakata W, Nakamura H, Hama N, Shide K, Kubuki Y,  
753 Hidaka T, Kameda T, Masuda K, Minato N, Kashiwase K, Izutsu K, Takaori-Kondo A, Miyazaki Y,  
754 Takahashi S, Shibata T, Kawamoto H, Akatsuka Y, Shimoda K, Takeuchi K, Seya T, Miyano S, Ogawa  
755 S. 2016. Aberrant PD-L1 expression through 3'-UTR disruption in multiple cancers. 7607. *Nature*  
756 534:402–406.
- 757 50. Abe H, Kaneda A, Fukayama M. 2015. Epstein-Barr Virus-Associated Gastric Carcinoma: Use of Host  
758 Cell Machineries and Somatic Gene Mutations. *Pathobiol J Immunopathol Mol Cell Biol* 82:212–  
759 223.
- 760 51. Akiyama M, Matsuda Y, Arai T, Saeki H. 2020. PD-L1 expression in malignant melanomas of the skin  
761 and gastrointestinal tract. *Oncol Lett* 19:2481–2488.

- 762 52. Fang W, Zhang J, Hong S, Zhan J, Chen N, Qin T, Tang Y, Zhang Y, Kang S, Zhou T, Wu X, Liang W, Hu  
763 Z, Ma Y, Zhao Y, Tian Y, Yang Y, Xue C, Yan Y, Hou X, Huang P, Huang Y, Zhao H, Zhang L. 2014. EBV-  
764 driven LMP1 and IFN- $\gamma$  up-regulate PD-L1 in nasopharyngeal carcinoma: Implications for  
765 oncotargeted therapy. *Oncotarget* 5:12189.
- 766 53. Veloza L, Teixido C, Castrejon N, Climent F, Carrió A, Marginet M, Soldini D, González-Farré B,  
767 Ribera-Cortada I, Lopez-Guillermo A, González-Barca E, Sierra A, Herrera M, Gómez C, Garcia A,  
768 Balagué O, Campo E, Martinez A. 2019. Clinicopathological evaluation of the programmed cell  
769 death 1 (PD1)/programmed cell death-ligand 1 (PD-L1) axis in post-transplant lymphoproliferative  
770 disorders: association with Epstein-Barr virus, PD-L1 copy number alterations, and outcome.  
771 *Histopathology* 75:799–812.
- 772 54. Aggarwal C, Abreu DR, Felip E, Carcereny E, Gottfried M, Wehler T, Ahn M-J, Dolled-Filhart M,  
773 Zhang J, Shentu Y, Rangwala R, Piperdi B, Baas P. 2016. Prevalence of PD-L1 expression in patients  
774 with non-small cell lung cancer screened for enrollment in KEYNOTE-001, -010, and -024. *Ann*  
775 *Oncol* 27:vi363.
- 776 55. Zheng L. 2017. PD-L1 Expression in Pancreatic Cancer. *JNCI J Natl Cancer Inst* 109:djw304.
- 777 56. Chen BJ, Chapuy B, Ouyang J, Sun HH, Roemer MGM, Xu ML, Yu H, Fletcher CDM, Freeman GJ,  
778 Shipp MA, Rodig SJ. 2013. PD-L1 expression is characteristic of a subset of aggressive B-cell  
779 lymphomas and virus-associated malignancies. *Clin Cancer Res Off J Am Assoc Cancer Res*  
780 19:3462–3473.
- 781 57. PD-L1 (B7-H1) expression by urothelial carcinoma of the bladder and BCG-induced granulomata -  
782 Inman - 2007 - Cancer - Wiley Online Library.

- 783 58. Choueiri TK, Fay AP, Gray KP, Callea M, Ho TH, Albiges L, Bellmunt J, Song J, Carvo I, Lampron M,  
784 Stanton ML, Hodi FS, McDermott DF, Atkins MB, Freeman GJ, Hirsch MS, Signoretti S. 2014. PD-L1  
785 expression in nonclear-cell renal cell carcinoma. *Ann Oncol* 25:2178–2184.
- 786 59. PD-L1 Expression Is Increased in a Subset of Basal Type Breast Cancer Cells.
- 787 60. Green MR, Monti S, Rodig SJ, Juszczynski P, Currie T, O'Donnell E, Chapuy B, Takeyama K, Neuberg  
788 D, Golub TR, Kutok JL, Shipp MA. 2010. Integrative analysis reveals selective 9p24.1 amplification,  
789 increased PD-1 ligand expression, and further induction via JAK2 in nodular sclerosing Hodgkin  
790 lymphoma and primary mediastinal large B-cell lymphoma. *Blood* 116:3268–3277.
- 791 61. Jun H, Seo SK, Jeong H-Y, Seo H-M, Zhu G, Chen L, Choi I-H. 2005. B7-H1 (CD274) inhibits the  
792 development of herpetic stromal keratitis (HSK). *FEBS Lett* 579:6259–6264.
- 793 62. Jones D, Como CN, Jing L, Blackmon A, Neff CP, Krueger O, Bubak AN, Palmer BE, Koelle DM, Nagel  
794 MA. 2019. Varicella zoster virus productively infects human peripheral blood mononuclear cells to  
795 modulate expression of immunoinhibitory proteins and blocking PD-L1 enhances virus-specific  
796 CD8+ T cell effector function. *PLoS Pathog* 15:e1007650.
- 797 63. Benedict CA, Loewendorf A, Garcia Z, Blazar BR, Janssen EM. 2008. Dendritic cell programming by  
798 cytomegalovirus stunts naive T cell responses via the PD-L1/PD-1 pathway. *J Immunol Baltim Md*  
799 1950 180:4836–4847.
- 800 64. Romeo MA, Gilardini Montani MS, Benedetti R, Giambelli L, D'Aprile R, Gaeta A, Faggioni A, Cirone  
801 M. 2021. The cross-talk between STAT1/STAT3 and ROS up-regulates PD-L1 and promotes the  
802 release of pro-inflammatory/immune suppressive cytokines in primary monocytes infected by  
803 HHV-6B. *Virus Res* 292:198231.

- 804 65. Ronaghy A, Wang H-Y, Thorson JA, Medeiros LJ, Xie Y, Zhang X, Sheikh-Fayyaz S. 2017. PD-L1 and  
805 Notch1 expression in KSHV/HHV-8 and EBV associated germinotropic lymphoproliferative disorder:  
806 case report and review of the literature. *Pathology (Phila)* 49:430–435.
- 807 66. Golrokh Mofrad M, Taghizadeh Maleki D, Faghihloo E. 2020. The roles of programmed death ligand  
808 1 in virus-associated cancers. *Infect Genet Evol J Mol Epidemiol Evol Genet Infect Dis* 84:104368.
- 809 67. Schönrich G, Raftery MJ. 2019. The PD-1/PD-L1 Axis and Virus Infections: A Delicate Balance. *Front*  
810 *Cell Infect Microbiol* 9:207.
- 811 68. Lim S-O, Li C-W, Xia W, Cha J-H, Chan L-C, Wu Y, Chang S-S, Lin W-C, Hsu J-M, Hsu Y-H, Kim T,  
812 Chang W-C, Hsu JL, Yamaguchi H, Ding Q, Wang Y, Yang Y, Chen C-H, Sahin AA, Yu D, Hortobagyi  
813 GN, Hung M-C. 2016. Deubiquitination and Stabilization of PD-L1 by CSN5. *Cancer Cell* 30:925–939.
- 814 69. Gires O, Zimmer-Strobl U, Gonnella R, Ueffing M, Marschall G, Zeidler R, Pich D, Hammerschmidt  
815 W. 1997. Latent membrane protein 1 of Epstein-Barr virus mimics a constitutively active receptor  
816 molecule. *EMBO J* 16:6131–6140.
- 817 70. Gewurz BE, Mar JC, Padi M, Zhao B, Shinnars NP, Takasaki K, Bedoya E, Zou JY, Cahir-Mcfarland E,  
818 Quackenbush J, Kieff E. 2011. Canonical NF- $\kappa$ B Activation Is Essential for Epstein-Barr Virus Latent  
819 Membrane Protein 1 TES2/CTAR2 Gene Regulation  $\nabla$ . *J Virol* 85:6764–6773.
- 820 71. Chen N, Fang W, Zhan J, Hong S, Tang Y, Kang S, Zhang Y, He X, Zhou T, Qin T, Huang Y, Yi X, Zhang  
821 L. 2015. Upregulation of PD-L1 by EGFR Activation Mediates the Immune Escape in EGFR-Driven  
822 NSCLC: Implication for Optional Immune Targeted Therapy for NSCLC Patients with EGFR Mutation.  
823 *J Thorac Oncol Off Publ Int Assoc Study Lung Cancer* 10:910–923.
- 824 72. Rauch S, Fackler OT. 2007. Viruses, lipid rafts and signal transduction. *Signal Transduct* 7:53–63.

- 825 73. Dang TO, Ogunniyi A, Barbee MS, Drilon A. 2016. Pembrolizumab for the treatment of PD-L1  
826 positive advanced or metastatic non-small cell lung cancer. *Expert Rev Anticancer Ther* 16:13–20.
- 827 74. Guo L, Zhang H, Chen B. 2017. Nivolumab as Programmed Death-1 (PD-1) Inhibitor for Targeted  
828 Immunotherapy in Tumor. *J Cancer* 8:410–416.
- 829 75. Krishnamurthy A, Jimeno A. 2017. Atezolizumab: A novel PD-L1 inhibitor in cancer therapy with a  
830 focus in bladder and non-small cell lung cancers. *Drugs Today Barc Spain* 1998 53:217–237.
- 831 76. Ricklefs FL, Alayo Q, Krenzlin H, Mahmoud AB, Speranza MC, Nakashima H, Hayes JL, Lee K, Balaj L,  
832 Passaro C, Rooj AK, Krasemann S, Carter BS, Chen CC, Steed T, Treiber J, Rodig S, Yang K, Nakano I,  
833 Lee H, Weissleder R, Breakefield XO, Godlewski J, Westphal M, Lamszus K, Freeman GJ, Bronisz A,  
834 Lawler SE, Chiocca EA. 2018. Immune evasion mediated by PD-L1 on glioblastoma-derived  
835 extracellular vesicles. *Sci Adv* 4.
- 836 77. Rosenzweig N, Dvir-Szternfeld R, Tsitsou-Kampeli A, Keren-Shaul H, Ben-Yehuda H, Weill-Raynal P,  
837 Cahalon L, Kertser A, Baruch K, Amit I, Weiner A, Schwartz M. 2019. PD-1/PD-L1 checkpoint  
838 blockade harnesses monocyte-derived macrophages to combat cognitive impairment in a  
839 tauopathy mouse model. *Nat Commun* 10:465.
- 840 78. Masterson L, Howard J, Gonzalez-Cruz J, Jackson C, Barnett C, Overton L, Liu H, Ladwa R, Simpson  
841 F, McGrath M, Wallwork B, Jones T, Ottensmeier C, Chua MLK, Perry C, Khanna R, Panizza B,  
842 Porceddu S, Lechner M. 2020. Immune checkpoint inhibitors in advanced nasopharyngeal  
843 carcinoma: Beyond an era of chemoradiation? *Int J Cancer* 146:2305–2314.
- 844 79. Wolchok JD, Kluger H, Callahan MK, Postow MA, Rizvi NA, Lesokhin AM, Segal NH, Ariyan CE,  
845 Gordon R-A, Reed K, Burke MM, Caldwell A, Kronenberg SA, Agunwamba BU, Zhang X, Lowy I,

- 846 Inzunza HD, Feely W, Horak CE, Hong Q, Korman AJ, Wigginton JM, Gupta A, Sznol M. 2013.
- 847 Nivolumab plus Ipilimumab in Advanced Melanoma. *N Engl J Med* 369:122–133.
- 848 80. Hurwitz SN, Cheerathodi MR, Nkosi D, York SB, Meckes DG. 2018. Tetraspanin CD63 Bridges  
849 Autophagic and Endosomal Processes To Regulate Exosomal Secretion and Intracellular Signaling  
850 of Epstein-Barr Virus LMP1. *J Virol* 92:e01969-17.
- 851 81. ExtraPEG: A Polyethylene Glycol-Based Method for Enrichment of Extracellular Vesicles | Scientific  
852 Reports.
- 853 82. Nkosi D, Howell LA, Cheerathodi MR, Hurwitz SN, Tremblay DC, Liu X, Meckes DG. 2018.  
854 Transmembrane Domains Mediate Intra- and Extracellular Trafficking of Epstein-Barr Virus Latent  
855 Membrane Protein 1. *J Virol* 92:e00280-18.
- 856 83. Hurwitz SN, Conlon MM, Rider MA, Brownstein NC, Meckes DG. 2016. Nanoparticle analysis sheds  
857 budding insights into genetic drivers of extracellular vesicle biogenesis. *J Extracell Vesicles* 5:31295.
- 858 84. Lässer C, Eldh M, Lötvall J. 2012. Isolation and characterization of RNA-containing exosomes. *J Vis  
859 Exp JoVE* e3037.
- 860 85. Measuring cell fluorescence using ImageJ — The Open Lab Book v1.0.

861

## 862 **Figures:**

863 **Fig 1. LMP1 expression in NPC cells leads to enhanced PD-L1 levels in MVs.** Cell  
864 lysates, 2K, 10K, and 100K were loaded at equal protein concentration of 20µg. (A and  
865 B) Immunoblot analyses of HK1 GFP-tagged LMP1 and HNE-1 HA-tagged LMP1  
866 demonstrate increased PD-L1 expression in the MV subpopulation compared to HK1



867 and HNE-1, respectively. (C and D) Quantification of 3 western blots from independent  
868 experiments demonstrate significantly higher levels of PD-L1 expression in MVs  
869 expressing LMP1 compared to control cell lines HK1 and HNE-1. (E and F)  
870 Quantification of 3 western blots in NPC cells expressing LMP1 revealed significantly  
871 higher levels of PD-L1 in the MVs compared to the other two EV subpopulations. \*\*,  
872  $P < 0.01$ ; \*,  $P < 0.05$ .

873

874 **Fig 2. PD-L1 is upregulated at the transcriptional level in LMP1 expressing cells and is**  
875 **detected in MVs.** RT-qPCR result of mRNA from normal HK1 cells or HK1 LMP1 induced  
876 cells (A) and MVs (B). The results were normalized to GAPDH. \*\*\*,  $P < 0.001$  \*\*,  $P < 0.01$ ; \*,  
877  $P < 0.05$ .

878

879 **Fig 3. Characterization of MVs from NPC cells.** (A and B) MVs harvested by 10,000 RPM  
880 spin from HK1 and HK1 LMP1 induced cells were examined by electron microscopy. (C-G)  
881 Nanoparticle tracking analysis showed significant increase in particles/ml, microgram/particle,  
882 mean, and mode size but not in particles/cell from MVs harvested from HK1 LMP1 cells  
883 compared to HK1 control cells. \*\*\*,  $P < 0.001$  \*\*,  $P < 0.01$ ; \*,  $P < 0.05$ .

884

885

886 **Fig 4. LMP1 enhances PD-L1 MV-associated surface levels.** (A) Flow cytometry analysis on  
887 MVs harvested from HK1 and HK1 LMP1 induced cells stained for either isotype control or PD-  
888 L1 surface antibody. (B and C) PD-L1 immunogold labelling of HK1 and HK1 LMP1 MVs. (D)

889 Quantification of gold particles per MV from 10 HK1 and HK1 LMP1 induced MVs. (E and F)  
890 Immunoblot analyses of HK1 LMP1 MVs with and without trypsin. Different PD-L1 antibodies  
891 were used to probe for endogenous levels of PD-L1 (E) and extracellular domain specific PD-  
892 L1 (F). CD71 and Syntenin-1 are used as negative and positive controls, respectively. \*\*,  
893  $P < 0.01$ .

894

895 **Fig 5. LMP1 and PD-L1 localize within the same MV subpopulation.** (A) Immunoblot of  
896 iodixanol density gradient fractions of HK1 LMP1 MVs demonstrating the presence of two  
897 distinct populations enriched in LMP1, PD-L1, and Caveolin-1 corresponding to fractions (3  
898 and 5), equal volumes loaded. (B) Immunoprecipitation of PD-L1, LMP1, and EGFR in HK1  
899 LMP1 MVs. Equal volumes of control Rabbit IgG antibody, control rabbit IgG antibody and HK1  
900 LMP1 MVs, and anti-PD-L1 antibody and HK1 LMP1 MVs were loaded. The first lane is 10%  
901 of the HK1 LMP1 MV sample loaded for comparison.

902

903 **Fig 6. LMP1 and PD-L1 colocalize in NPC cells and are enriched in lipid rafts.** All confocal  
904 images are Maximum Intensity Projections of Z-stacks, Scale bar: 10 $\mu$ m. (A) HNE-1 cells were  
905 transfected with GFP-tagged PD-L1, RFP-tagged LMP1, and Hoechst nuclear stain, for live-  
906 cell confocal microscopy. (C) HK1 GFP-tagged LMP1 cells induced or not induced with  
907 doxycycline were fixed, stained for PD-L1 (Alexa Fluor plus 405) and Nuclear-ID Red DNA  
908 stain and imaged by confocal microscopy. (B and D) Pearson's Correlation Coefficient for PD-  
909 L1 and LMP1 in the HNE-1 transfected cells and induced HK1 LMP1 cells was measured in 10  
910 cells with a value of around 0.7 and 0.8, respectively. (E) Induced HK1 LMP1 cells

911 demonstrate significantly higher PD-L1 fluorescence compared to un-induced cells.  
912 Immunoblot analyses of whole cell lysates or lipid raft fraction of induced HK1 LMP1 cells or  
913 HK1 control cells demonstrate lipid raft enrichment of LMP1, PD-L1, and Caveolin-1. \*\*\*\*,  
914  $P < 0.0001$ . CTCF=corrected total cell fluorescence.

915

**Fig 1**

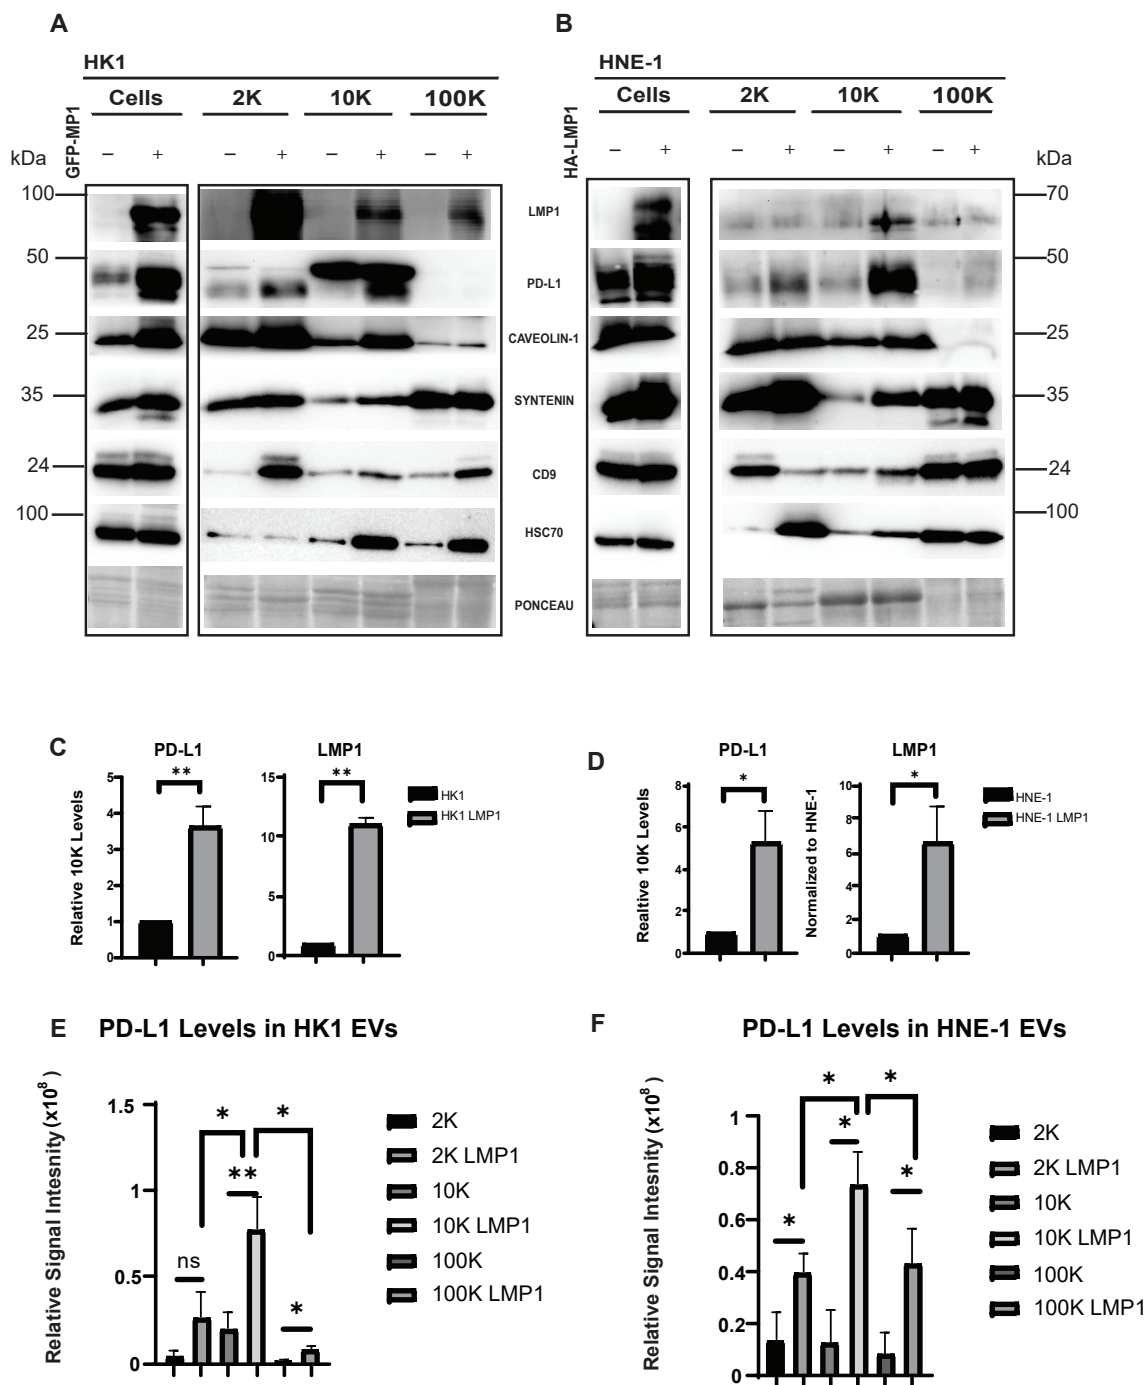

**Fig 1. LMP1 expression in NPC cells leads to enhanced PD-L1 levels in MVs.** Cell lysates, 2K, 10K, and 100K were loaded at equal protein concentration of 20µg. (A and B) Immunoblot analyses of HK1 GFP-tagged LMP1 and HNE-1 HA-tagged LMP1 demonstrate increased PD-L1 expression in the MVsubpopulation compared to HK1 and HNE-1, respectively. (C and D) Quantification of 3 western blots from independent experiments demonstrate significantly higher levels of PD-L1 expression in MVs expressing LMP1 compared to control cell lines HK1 and HNE-1. (E and F) Quantification of 3 western blots revealed significantly higher levels of PD-L1 in the MVs compared to the other two EV subpopulations. \*\*, P<0.01; \*, P<0.05.

Fig 2

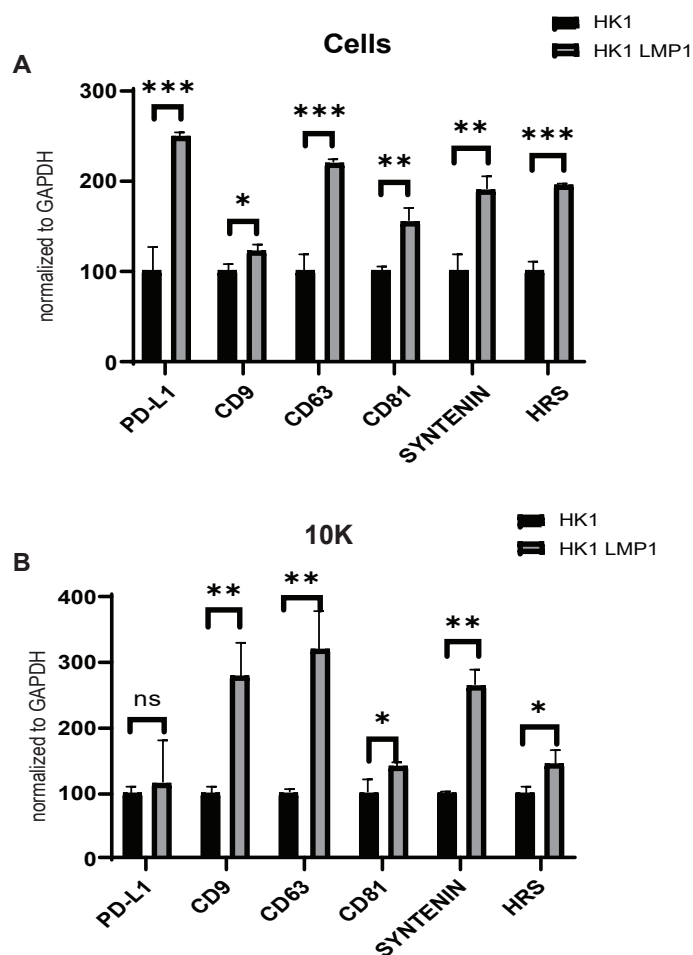

**Fig 2. PD-L1 is upregulated at the transcriptional level in LMP1 expressing cells and detected in MVs.** RT-qPCR result of mRNA from normal HK1 cells or HK1 LMP1 induced cells (A) and MVs (B). The results were normalized to GAPDH. \*\*\*,  $P < 0.001$ ; \*\*,  $P < 0.01$ ; \*,  $P < 0.05$ .

Fig 3

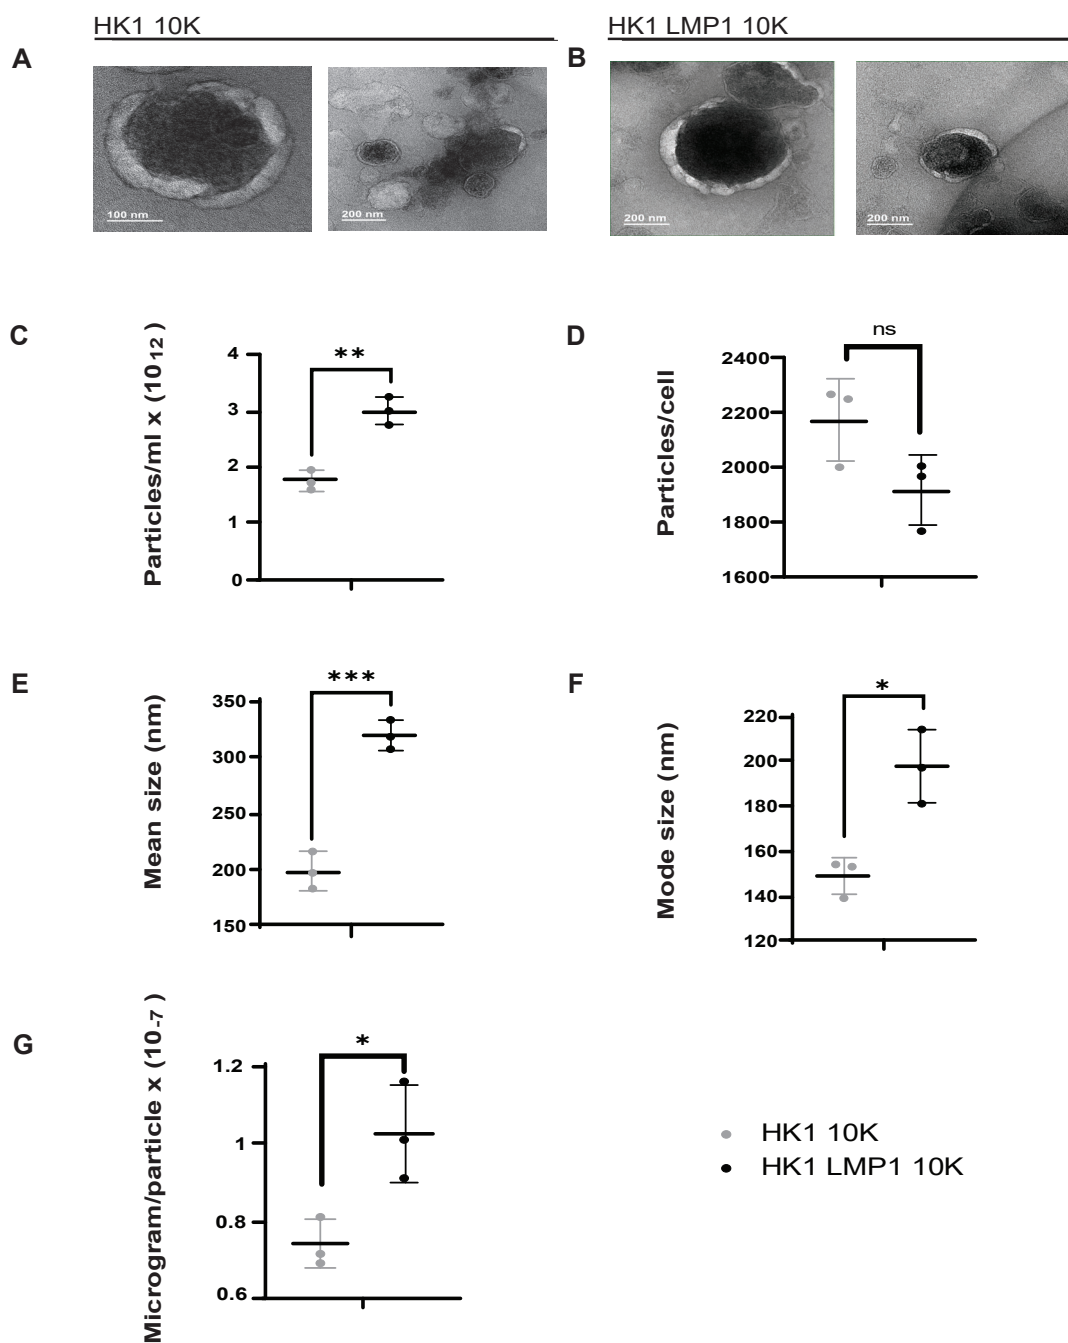

**Fig 3. Characterization of MVs from NPC cells.** (A and B) MVs harvested by 10,000 RPM spin from HK1 and HK1 LMP1 induced cells were examined by electron microscopy. (C-G) Nanoparticle tracking analysis showed significant increase in particles/ml, microgram/particle, mean, and mode size but not in particles/cell from MVs harvested from HK1 LMP1 cells compared to HK1 control cells. \*\*\*, P<0.001 \*\*, P<0.01; \*, P<0.05.

**Fig 4**

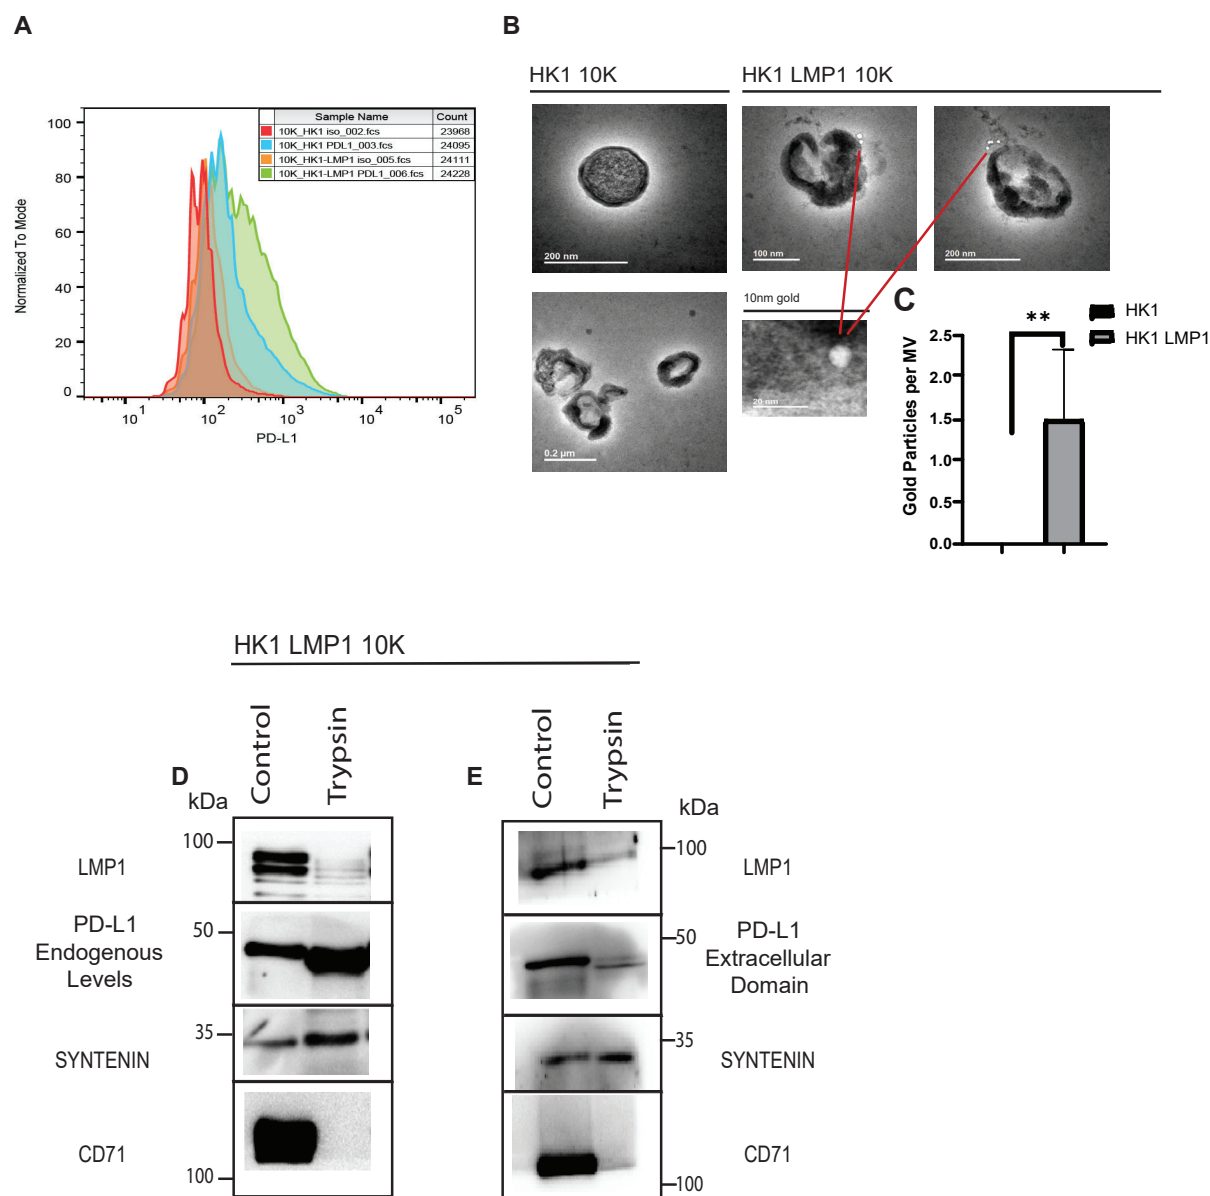

**Fig 4. MV-associated PD-L1 surface expression is enhanced by LMP1 expression.** (A) Flow cytometry analysis on MVs harvested from HK1 and HK1 LMP1 induced cells stained for either isotype control or PD-L1 surface antibody. (B and C) PD-L1 immunogold labelling of HK1 and HK1 LMP1 MVs. (D) Quantification of gold particles per MV from 10 HK1 and HK1 LMP1 induced MVs. (E and F) Immunoblot analyses of HK1 LMP1 MVs with and without trypsin. Different PD-L1 antibodies were used to probe for endogenous levels of PD-L1 (E) and extracellular domain specific PD-L1 (F). CD71 and Syntenin-1 are used as negative and positive controls, respectively. \*\*,  $P < 0.01$ .

**Fig 5**

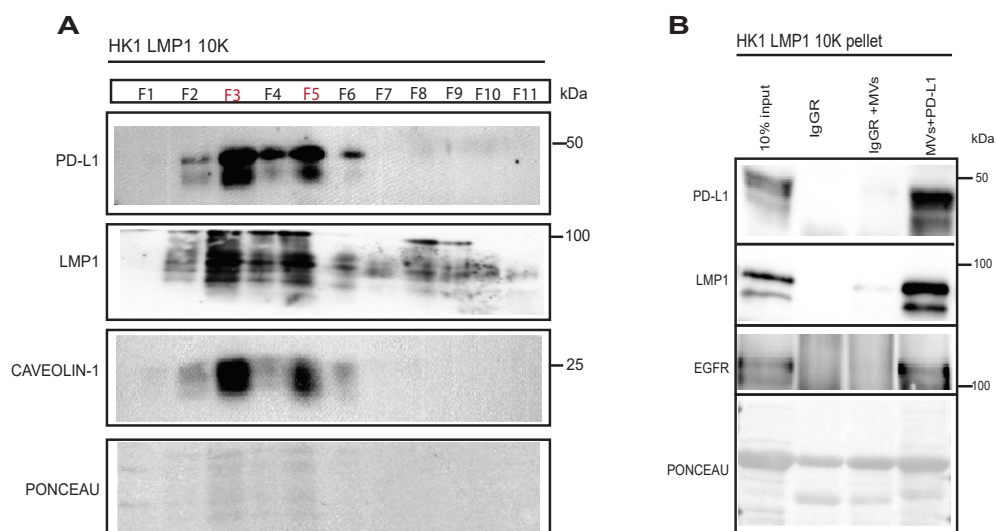

**Fig 5. LMP1 and PD-L1 co-migrate and localize within the same MV subpopulation.**

(A) Immunoblot of iodixanol density gradient fractions of HK1 LMP1 MVs demonstrating the presence of two distinct populations enriched in LMP1, PD-L1, and Caveolin-1 corresponding to fractions (3 and 5), equal volumes loaded. (B) Immunoprecipitation of PD-L1, LMP1, and EGFR in HK1 LMP1 MVs. Equal volumes of control Rabbit IgG antibody, control rabbit IgG antibody and HK1 LMP1 MVs, and anti-PD-L1 antibody and HK1 LMP1 MVs were loaded. The first lane is 10% of the HK1 LMP1 MV sample loaded for comparison.



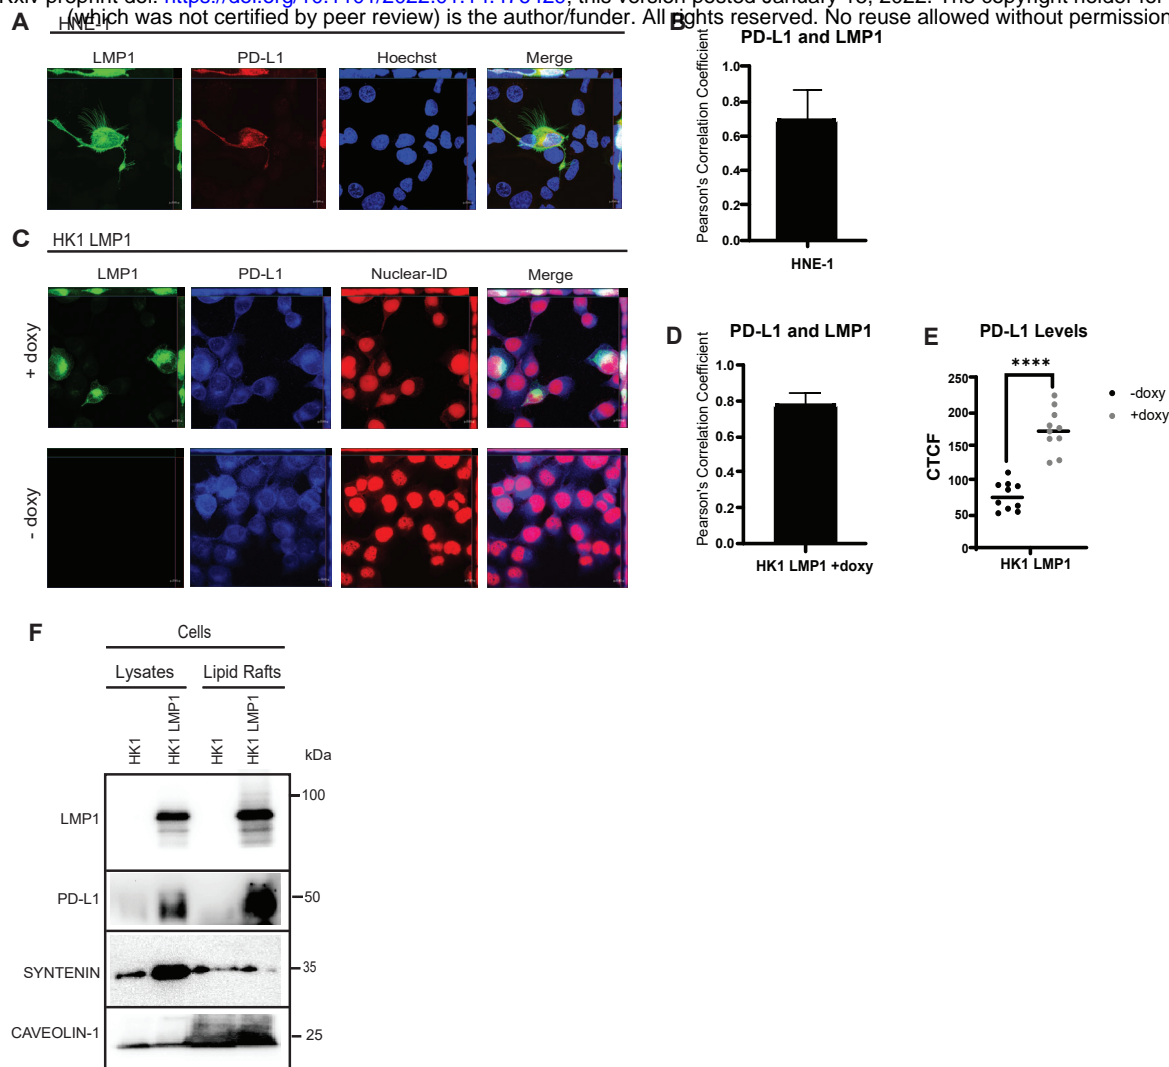

**Fig 6. LMP1 and PD-L1 colocalize in NPC cells and are enriched in lipid rafts.** All confocal images are Maximum Intensity Projections of Z-stacks, Scale bar: 10µm. (A) HNE-1 cells were transfected with GFP-tagged PD-L1, RFP-tagged LMP1, and Hoechst nuclear stain, for live-cell confocal microscopy. (C) HK1 GFP-tagged LMP1 cells induced or not induced with doxycycline were fixed, stained for PD-L1 (Alexa Fluor plus 405) and Nuclear-ID Red DNA stain and imaged by confocal microscopy. (B and D) Pearson's Correlation Coefficient for PD-L1 and LMP1 in the HNE-1 transfected cells and induced HK1 LMP1 cells was measured in 10 cells with a value of around 0.7 and 0.8, respectively. (E) Induced HK1 LMP1 cells demonstrate significantly higher PD-L1 fluorescence compared to un-induced cells. Immunoblot analyses of whole cell lysates or lipid raft fraction of induced HK1 LMP1 cells or HK1 control cells demonstrate lipid raft enrichment of LMP1, PD-L1, and Caveolin-1. \*\*\*\*, P<0.0001 CTCF=corrected total cell fluorescence.
